# Supplementary material for: Expressing banana transcription factor MaERFVII3 in Arabidopsis confers enhanced waterlogging tolerance and root growth
Source: PeerJ journal article supplement (doi:10.7717/peerj.17285), 2024-04-30
Supplement: Figure_3_Original_images.pdf [file Figure_3_Original_images.pdf]

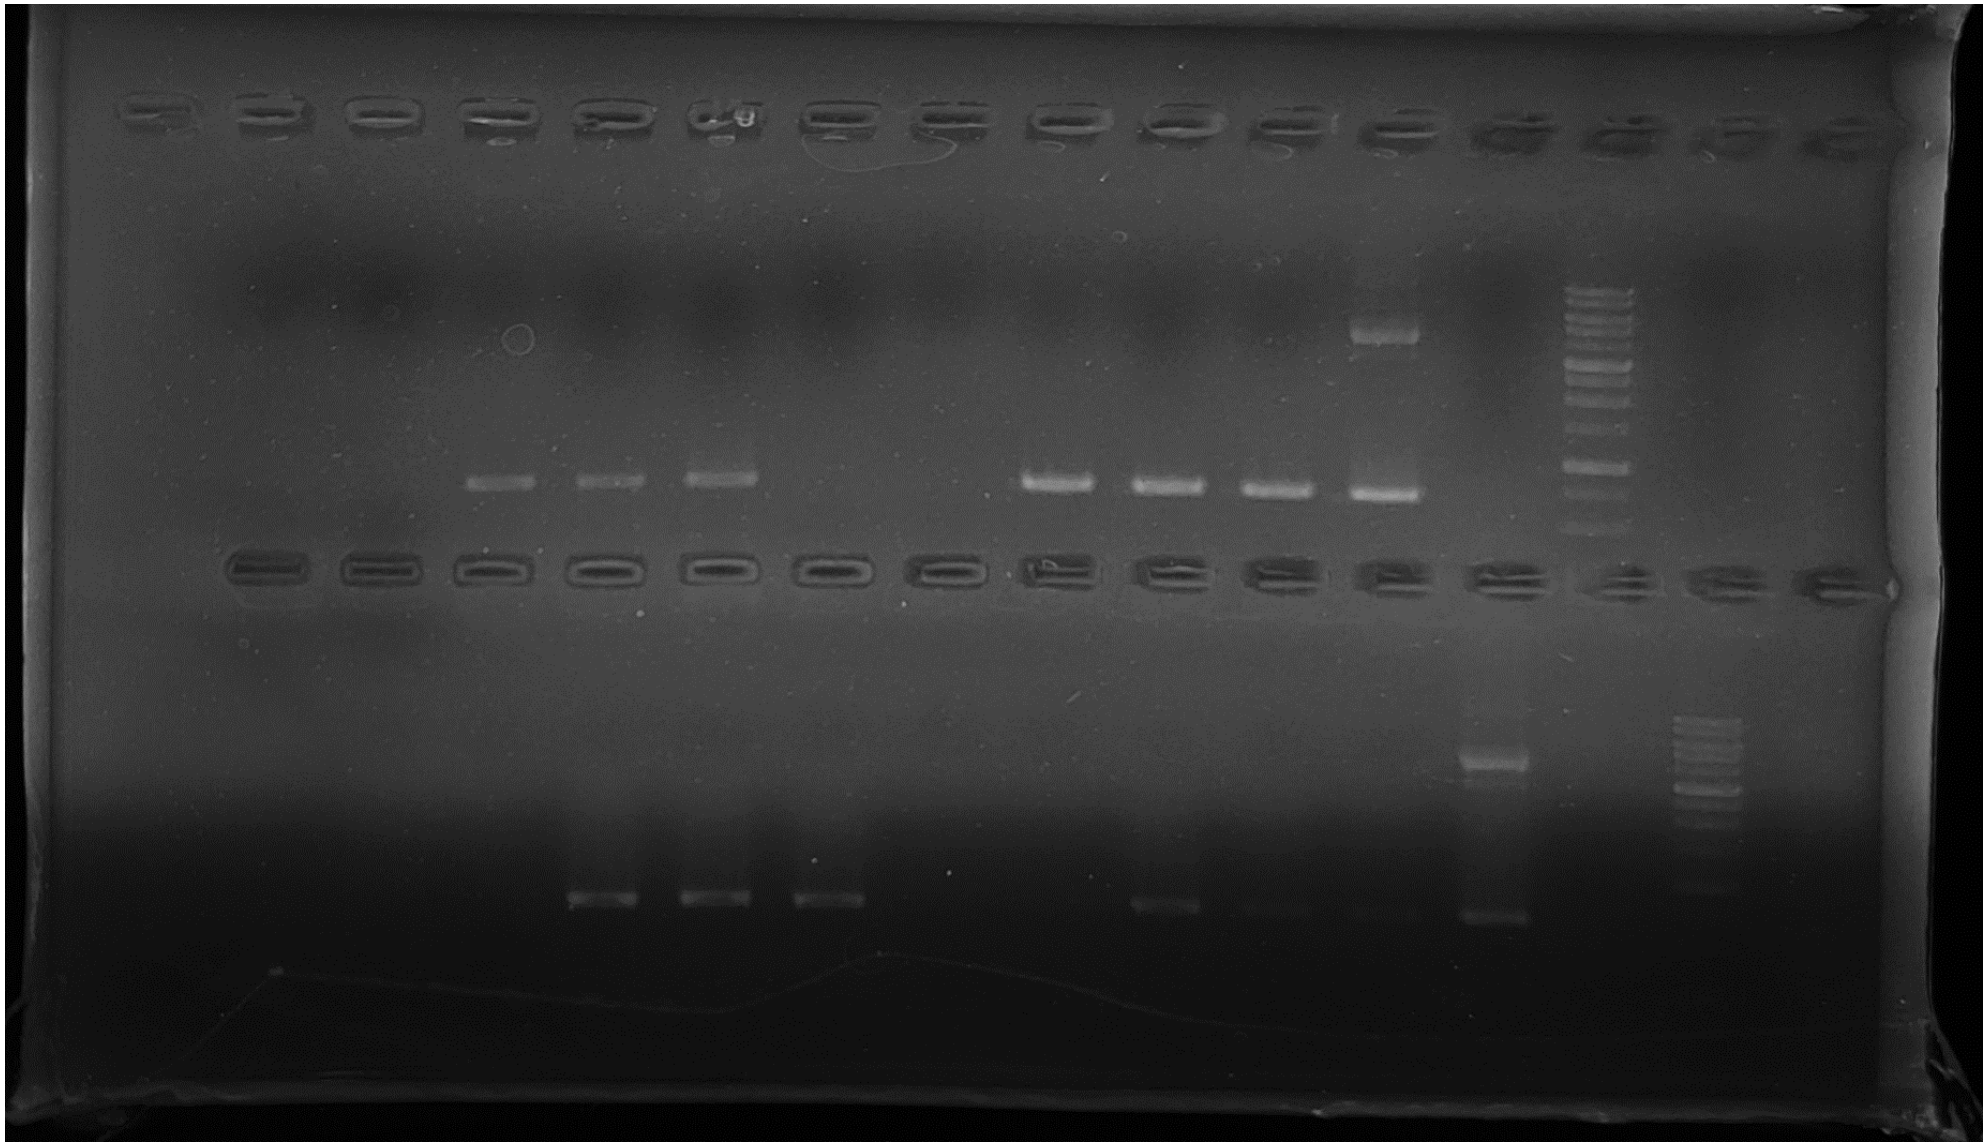

Figure 3B

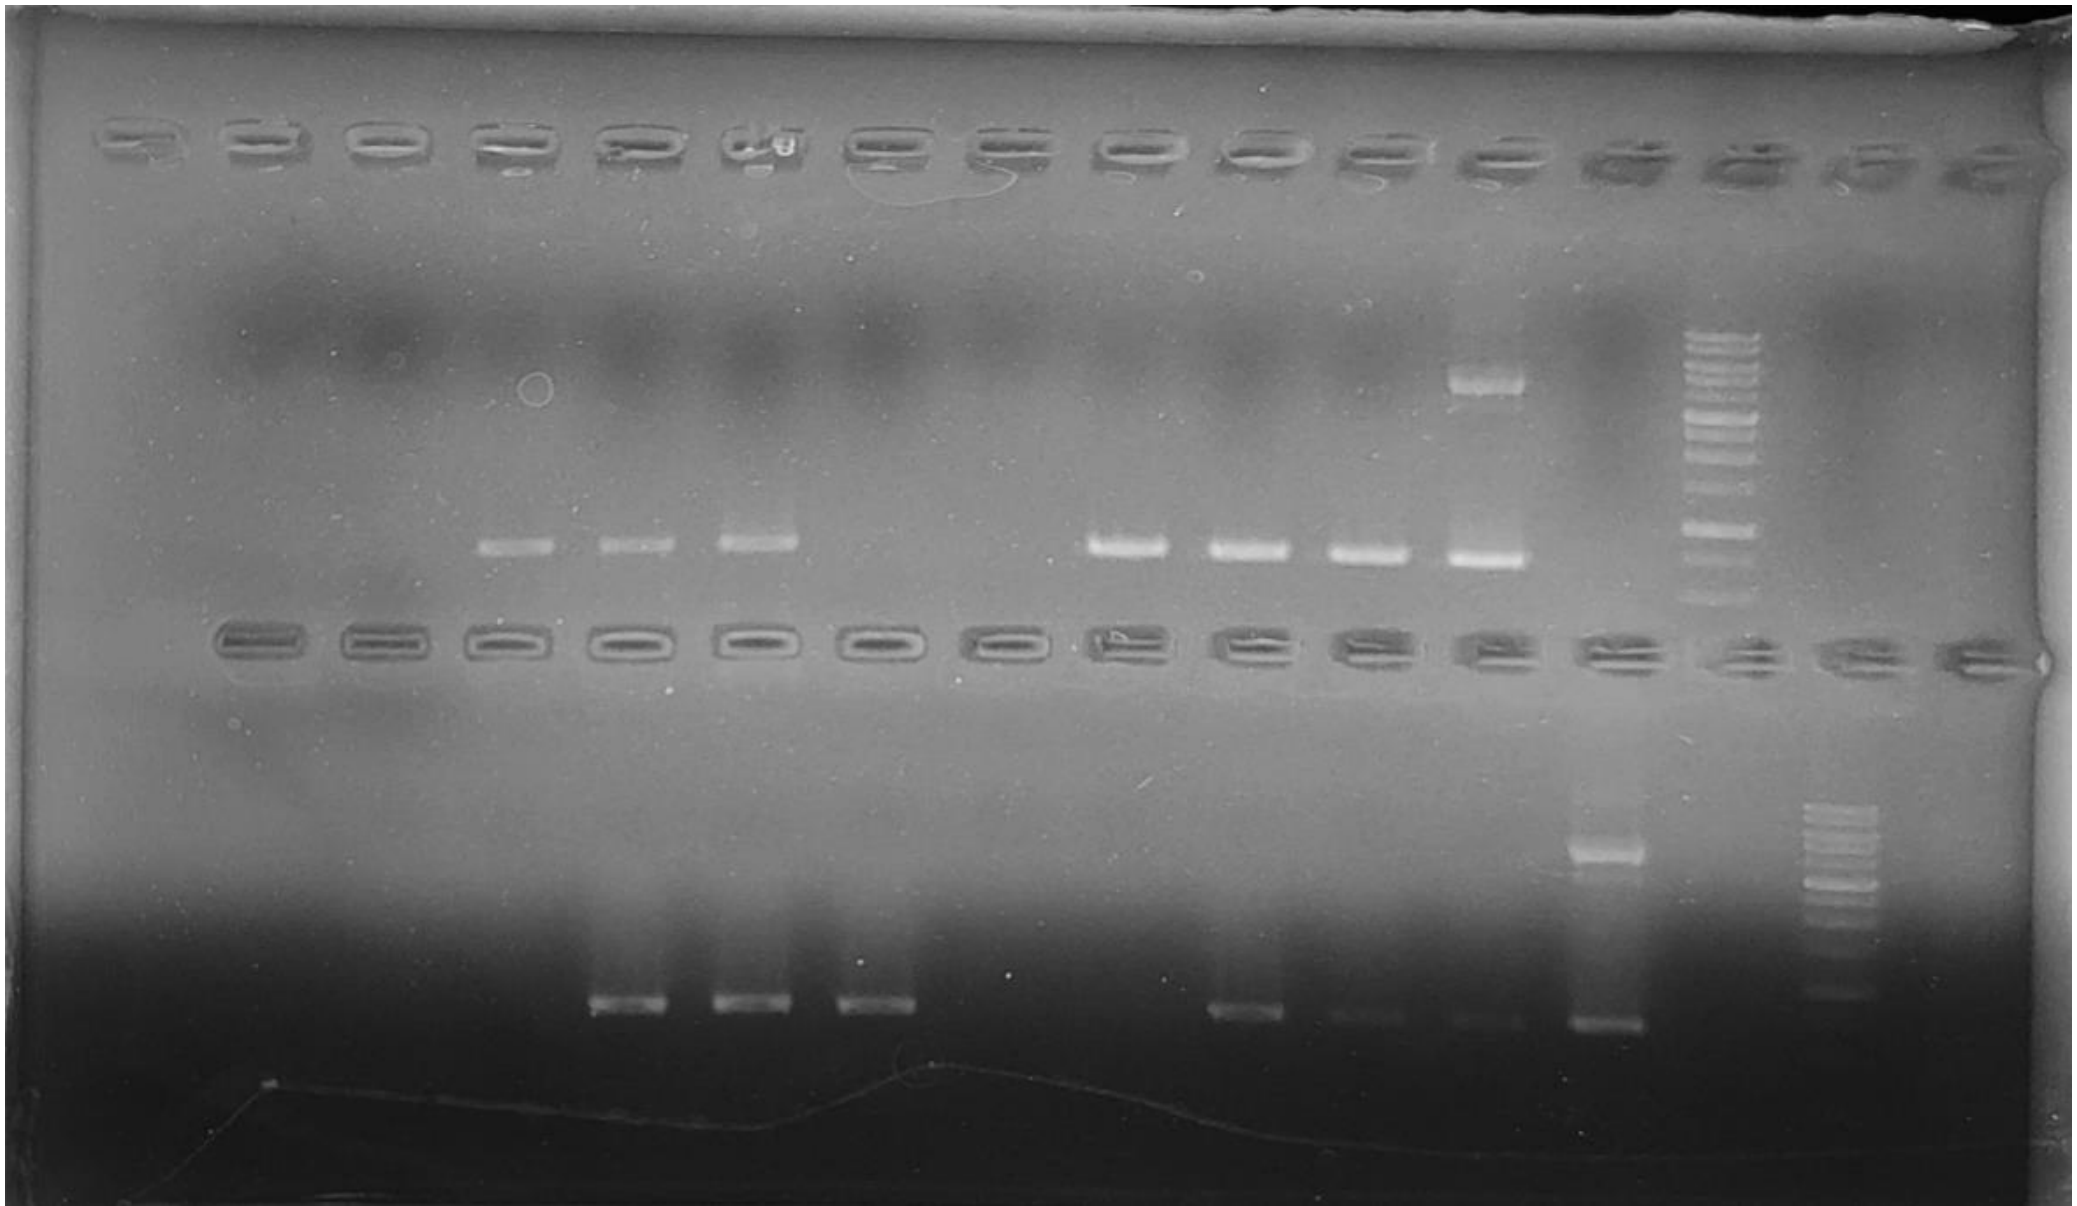

Figure 3C

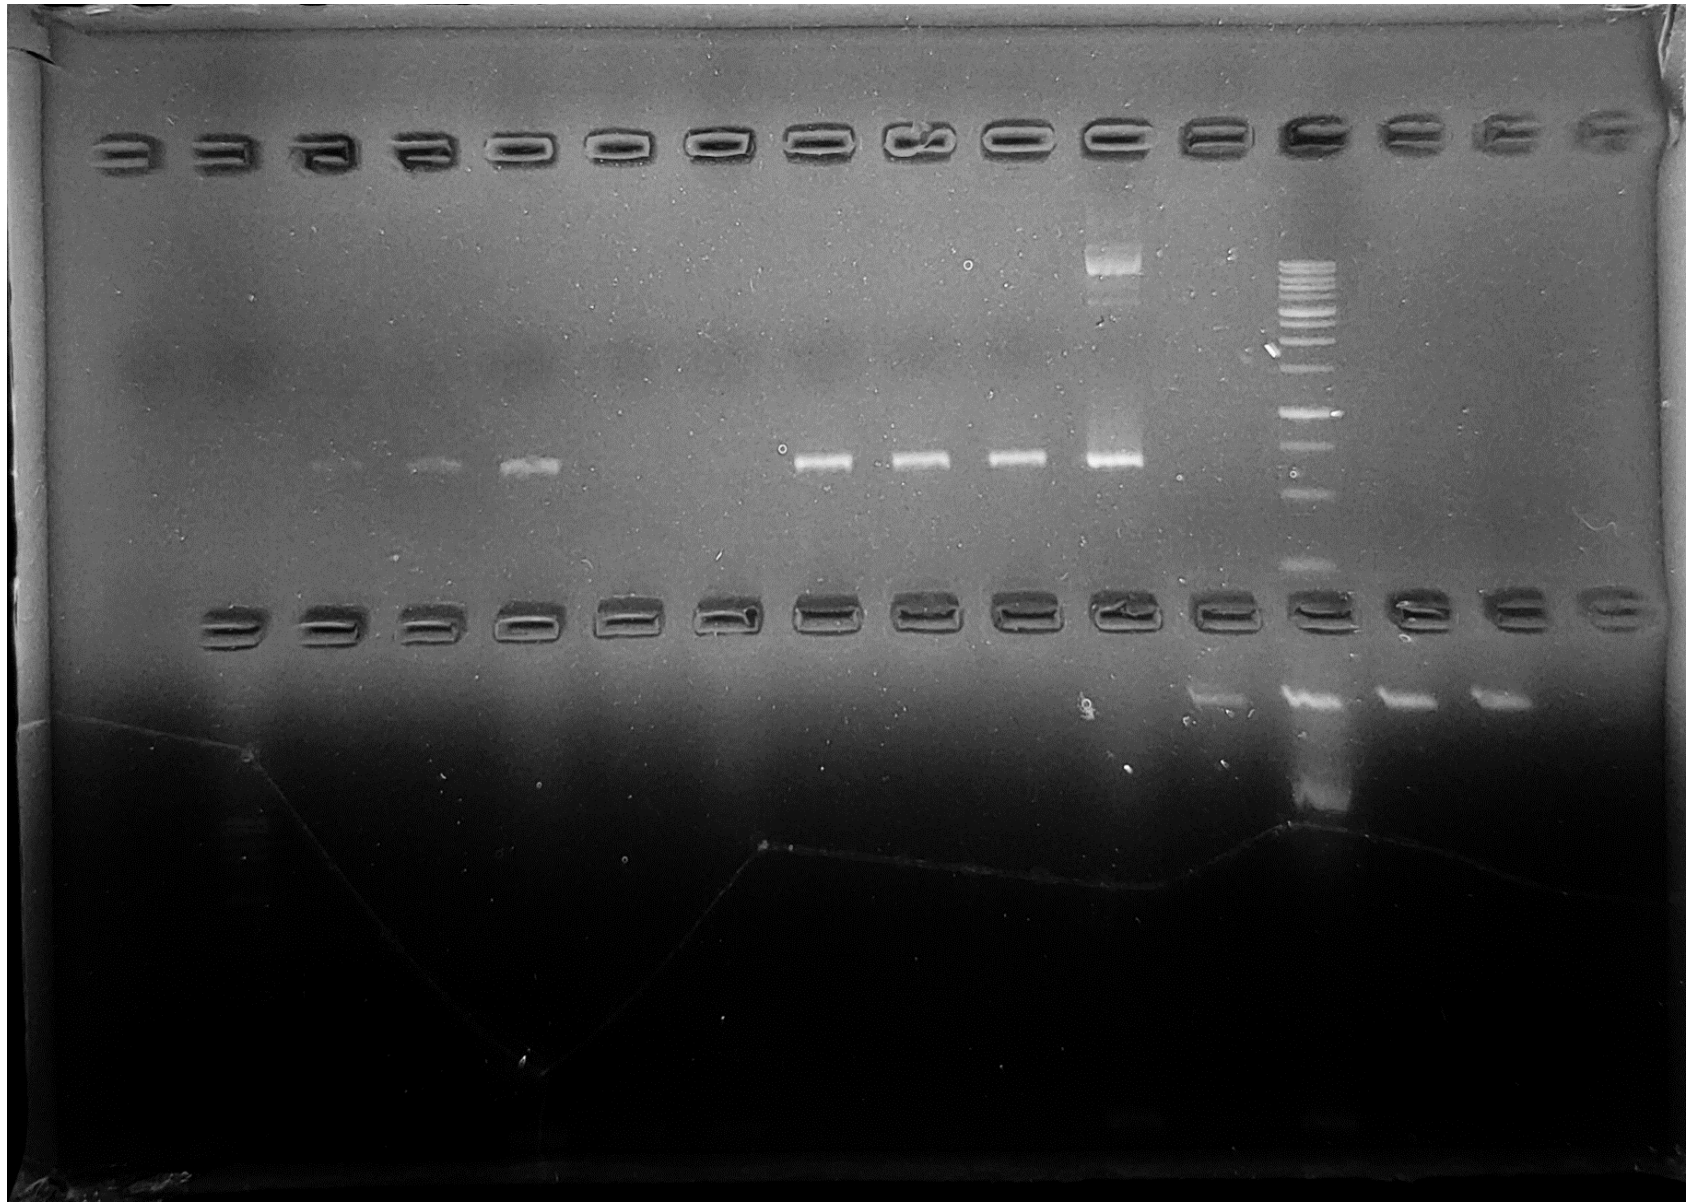

Figure 3D
