# Supplementary material for: Expressing banana transcription factor MaERFVII3 in Arabidopsis confers enhanced waterlogging tolerance and root growth
Source: PeerJ journal article supplement (doi:10.7717/peerj.17285), 2024-04-30
Supplement: In_silico_specificity_screen.pdf [file In_silico_specificity_screen.pdf]

# AtADH1

## Primer pair 1

|                | Sequence (5'->3')      | Length | Tm    | GC%   | Self complementarity | Self 3' complementarity |
|----------------|------------------------|--------|-------|-------|----------------------|-------------------------|
| Forward primer | TATTCGATGCAAAGCTGCTGTG | 22     | 59.90 | 45.45 | 7.00                 | 7.00                    |
| Reverse primer | CGAACTTCGTGTTTCTGCGGT  | 21     | 61.72 | 52.38 | 7.00                 | 0.00                    |

### Products on target templates

>NM\_106362.3 Arabidopsis thaliana alcohol dehydrogenase 1 (ADH1), mRNA

product length = 93

```
Forward primer 1 TATTCGATGCAAAGCTGCTGTG 22
Template      275 ..... 296
```

```
Reverse primer 1 CGAACTTCGTGTTTCTGCGGT 21
Template      367 ..... 347
```

# AtHRE2

## Primer pair 1

|                | Sequence (5'->3')     | Length | Tm    | GC%   | Self complementarity | Self 3' complementarity |
|----------------|-----------------------|--------|-------|-------|----------------------|-------------------------|
| Forward primer | GAAGCGTAAACCCGTCTCAGT | 21     | 60.34 | 52.38 | 4.00                 | 1.00                    |
| Reverse primer | TTTGCTCGGGCACGAATCT   | 19     | 60.00 | 52.63 | 6.00                 | 1.00                    |

### Products on target templates

>NM\_130320.4 Arabidopsis thaliana Integrase-type DNA-binding superfamily protein (ERF71), mRNA

product length = 123

```
Forward primer 1 GAAGCGTAAACCCGTCTCAGT 21
Template      299 ..... 319
```

```
Reverse primer 1 TTTGCTCGGG-CACGAATCT 19
Template      422 .....T..... 403
```

product length = 123

```
Forward primer 1 GAAGCGTAAACCCGTCTCAGT 21
Template      299 ..... 319
```

```
Reverse primer 1 TTTGCTCGGG-CACGAATCT 19
Template      422 .....T..... 403
```

# AtLBD16

## Primer pair 1

|                | Sequence (5'->3')     | Length | Tm    | GC%   | Self complementarity | Self 3' complementarity |
|----------------|-----------------------|--------|-------|-------|----------------------|-------------------------|
| Forward primer | TCAAACCGGAGGAGGAGTAT  | 20     | 57.46 | 50.00 | 4.00                 | 2.00                    |
| Reverse primer | AGCCTGAAGCTCACCTAAATC | 21     | 57.73 | 47.62 | 5.00                 | 0.00                    |

### Products on target templates

>NM\_129804.4 Arabidopsis thaliana lateral organ boundaries-domain 16 (LBD16), mRNA

product length = 112

```
Forward primer 1 TCAAACCGGAGGAGGAGTAT 20
Template      915 ..... 934
```

```
Reverse primer 1 AGCCTGAAGCTCACCTAAATC 21
Template      1026 ..... 1006
```

# AtLBD18

## Primer pair 1

---

|                | Sequence (5'->3')    | Length | Tm    | GC%   | Self complementarity | Self 3' complementarity |
|----------------|----------------------|--------|-------|-------|----------------------|-------------------------|
| Forward primer | GAAGTGTGTGCCGGGATGTA | 20     | 60.04 | 55.00 | 4.00                 | 2.00                    |
| Reverse primer | CGTTACTGGCTCCGAACACT | 20     | 60.04 | 55.00 | 3.00                 | 1.00                    |

### Products on target templates

>NM\_180105.2 Arabidopsis thaliana LOB domain-containing protein 18 (LBD18), mRNA

product length = 98

Forward primer 1 GAAGTGTGTGCCGGGATGTA 20  
Template 391 ..... 410

Reverse primer 1 CGTTACTGGCTCCGAACACT 20  
Template 488 ..... 469

---

# AtPIN1

## Primer pair 1

|                | Sequence (5'->3')    | Length | Tm    | GC%   | Self complementarity | Self 3' complementarity |
|----------------|----------------------|--------|-------|-------|----------------------|-------------------------|
| Forward primer | ACAAAACGACGCAGGCTAAG | 20     | 59.13 | 50.00 | 3.00                 | 3.00                    |
| Reverse primer | AGCTGGCATTCAATGTTCC  | 20     | 56.96 | 45.00 | 6.00                 | 1.00                    |

### Products on target templates

>NM\_106017.4 Arabidopsis thaliana Auxin efflux carrier family protein (PIN1), mRNA

product length = 164

```
Forward primer 1  ACAAAAACGACGCAGGCTAAG  20
Template      1439  ..... 1458

Reverse primer 1  AGCTGGCATTCAATGTTCC  20
Template      1602  ..... 1583
```

# AtRAP2.2

## Primer pair 1

|                | Sequence (5'->3')      | Length | Tm    | GC%   | Self complementarity | Self 3' complementarity |
|----------------|------------------------|--------|-------|-------|----------------------|-------------------------|
| Forward primer | CATGGAAGAGAAGCCTCAGATG | 22     | 58.53 | 50.00 | 4.00                 | 3.00                    |
| Reverse primer | GCCCTGATCGGAACTGAAATA  | 21     | 57.81 | 47.62 | 4.00                 | 2.00                    |

### Products on target templates

>NM\_180251.3 Arabidopsis thaliana uncharacterized protein (RAP2.2), mRNA

product length = 103

```
Forward primer 1  CATGGAAGAGAAGCCTCAGATG  22
Template       1012 ..... 1033
```

```
Reverse primer 1  GCCCTGATCGGAACTGAAATA  21
Template       1114 ..... 1094
```

>NM\_180252.1 Arabidopsis thaliana uncharacterized protein (RAP2.2), mRNA

product length = 103

```
Forward primer 1  CATGGAAGAGAAGCCTCAGATG  22
Template       847 ..... 868
```

```
Reverse primer 1  GCCCTGATCGGAACTGAAATA  21
Template       949 ..... 929
```

>NM\_112281.2 Arabidopsis thaliana uncharacterized protein (RAP2.2), mRNA

product length = 103

```
Forward primer 1  CATGGAAGAGAAGCCTCAGATG  22
Template       862 ..... 883
```

```
Reverse primer 1  GCCCTGATCGGAACTGAAATA  21
Template       964 ..... 944
```

# AtRAP2.12

## Primer pair 1

|                | Sequence (5'->3')       | Length | Tm    | GC%   | Self complementarity | Self 3' complementarity |
|----------------|-------------------------|--------|-------|-------|----------------------|-------------------------|
| Forward primer | TGCTGGATGTAATGGGTATCAG  | 22     | 57.64 | 45.45 | 3.00                 | 1.00                    |
| Reverse primer | CAGAAGAGATGTCGGGAGTTATC | 23     | 58.13 | 47.83 | 4.00                 | 2.00                    |

### Products on target templates

>NM\_001036108.3 Arabidopsis thaliana uncharacterized protein (RAP2.12), mRNA

product length = 113

```
Forward primer 1 TGCTGGATGTAATGGGTATCAG 22
Template      886 .....
```

```
Reverse primer 1 CAGAAGAGATGTCGGGAGTTATC 23
Template      998 .....
```

>NM\_104269.4 Arabidopsis thaliana related to AP2 12 (RAP2.12), mRNA

product length = 113

```
Forward primer 1 TGCTGGATGTAATGGGTATCAG 22
Template      1142 .....
```

```
Reverse primer 1 CAGAAGAGATGTCGGGAGTTATC 23
Template      1254 .....
```

>NM\_001084249.1 Arabidopsis thaliana uncharacterized protein (RAP2.12), mRNA

product length = 113

```
Forward primer 1 TGCTGGATGTAATGGGTATCAG 22
Template      868 .....
```

```
Reverse primer 1 CAGAAGAGATGTCGGGAGTTATC 23
Template      980 .....
```

# AtTUB

## Primer pair 1

|                | Sequence (5'→3')     | Length | Tm    | GC%   | Self complementarity | Self 3' complementarity |
|----------------|----------------------|--------|-------|-------|----------------------|-------------------------|
| Forward primer | GGTTGGTTTTGCTCCTCACC | 22     | 61.65 | 54.55 | 2.00                 | 0.00                    |
| Reverse primer | TAGCGTCCGTGCCTGGGTC  | 20     | 64.62 | 65.00 | 2.00                 | 1.00                    |

### Products on target templates

>NM\_125665.4 Arabidopsis thaliana tubulin beta chain 2 (TUB2), mRNA

```
product length = 129
Forward primer 1  GGTTGGTTTTGCTCCTCACC  22
Template       1044  ..... 1065

Reverse primer 1  TAGCGTCCGTGCCTGGGTC  20
Template       1172  ..... 1153
```

>NM\_125664.4 Arabidopsis thaliana tubulin beta chain 2 (TUB2), mRNA

```
product length = 129
Forward primer 1  GGTTGGTTTTGCTCCTCACC  22
Template       1065  ...G..... 1086

Reverse primer 1  TAGCGTCCGTGCCTGGGTC  20
Template       1193  ..... 1174
```

>NM\_128008.3 Arabidopsis thaliana tubulin beta-7 chain (TUB7), mRNA

```
product length = 129
Forward primer 1  GGTTGGTTTTGCTCCTCACC  22
Template       926  ...G..A..... 947

Reverse primer 1  TAGCGTCCGTGCCTGGGTC  20
Template       1054  ....A....T..... 1035
```

>NM\_106228.3 Arabidopsis thaliana tubulin beta-1 chain (TUB1), mRNA

```
product length = 129
Forward primer 1  GGTTGGTTTTGCTCCTCACC  22
Template       1022  .....C..C.....T 1043

Reverse primer 1  TAGCGTCCGTGCCTGGGTC  20
Template       1150  ..A.....G.G...A.. 1131
```

>NM\_101856.3 Arabidopsis thaliana tubulin beta-5 chain (TUB5), mRNA

```
product length = 129
Forward primer 1  GGTTGGTTTTGCTCCTCACC  22
Template       1155  ...G.....G..C.....T 1176

Reverse primer 1  TAGCGTCCGTGCCTGGGTC  20
Template       1283  ..A.....A.G...A.. 1264
```



# AtUBQ

| Primer pair 1                                                       |      | Sequence (5'->3')            | Length | Tm    | GC%   | Self complementarity | Self 3' complementarity |
|---------------------------------------------------------------------|------|------------------------------|--------|-------|-------|----------------------|-------------------------|
| Forward primer                                                      |      | GGCCTTGTATAATCCCTGATGAATAAG  | 27     | 59.66 | 40.74 | 5.00                 | 5.00                    |
| Reverse primer                                                      |      | AAAGAGATAACAGGAACGGAAACATAGT | 28     | 60.74 | 35.71 | 2.00                 | 2.00                    |
| <b>Products on target templates</b>                                 |      |                              |        |       |       |                      |                         |
| >NM_001084884.5 Arabidopsis thaliana polyubiquitin 10 (UBQ10), mRNA |      |                              |        |       |       |                      |                         |
| product length = 61                                                 |      |                              |        |       |       |                      |                         |
| Forward primer                                                      | 1    | GGCCTTGTATAATCCCTGATGAATAAG  | 27     |       |       |                      |                         |
| Template                                                            | 1493 | .....                        | 1519   |       |       |                      |                         |
| Reverse primer                                                      | 1    | AAAGAGATAACAGGAACGGAAACATAGT | 28     |       |       |                      |                         |
| Template                                                            | 1553 | .....                        | 1526   |       |       |                      |                         |
| >NM_001340546.1 Arabidopsis thaliana polyubiquitin 10 (UBQ10), mRNA |      |                              |        |       |       |                      |                         |
| product length = 61                                                 |      |                              |        |       |       |                      |                         |
| Forward primer                                                      | 1    | GGCCTTGTATAATCCCTGATGAATAAG  | 27     |       |       |                      |                         |
| Template                                                            | 619  | .....                        | 645    |       |       |                      |                         |
| Reverse primer                                                      | 1    | AAAGAGATAACAGGAACGGAAACATAGT | 28     |       |       |                      |                         |
| Template                                                            | 679  | .....                        | 652    |       |       |                      |                         |
| >NM_001340547.1 Arabidopsis thaliana polyubiquitin 10 (UBQ10), mRNA |      |                              |        |       |       |                      |                         |
| product length = 61                                                 |      |                              |        |       |       |                      |                         |
| Forward primer                                                      | 1    | GGCCTTGTATAATCCCTGATGAATAAG  | 27     |       |       |                      |                         |
| Template                                                            | 1058 | .....                        | 1084   |       |       |                      |                         |
| Reverse primer                                                      | 1    | AAAGAGATAACAGGAACGGAAACATAGT | 28     |       |       |                      |                         |
| Template                                                            | 1118 | .....                        | 1091   |       |       |                      |                         |
| >NM_178968.5 Arabidopsis thaliana polyubiquitin 10 (UBQ10), mRNA    |      |                              |        |       |       |                      |                         |
| product length = 61                                                 |      |                              |        |       |       |                      |                         |
| Forward primer                                                      | 1    | GGCCTTGTATAATCCCTGATGAATAAG  | 27     |       |       |                      |                         |
| Template                                                            | 1724 | .....                        | 1750   |       |       |                      |                         |
| Reverse primer                                                      | 1    | AAAGAGATAACAGGAACGGAAACATAGT | 28     |       |       |                      |                         |
| Template                                                            | 1784 | .....                        | 1757   |       |       |                      |                         |
| >NM_116771.5 Arabidopsis thaliana polyubiquitin 10 (UBQ10), mRNA    |      |                              |        |       |       |                      |                         |
| product length = 61                                                 |      |                              |        |       |       |                      |                         |
| Forward primer                                                      | 1    | GGCCTTGTATAATCCCTGATGAATAAG  | 27     |       |       |                      |                         |
| Template                                                            | 1303 | .....                        | 1329   |       |       |                      |                         |
| Reverse primer                                                      | 1    | AAAGAGATAACAGGAACGGAAACATAGT | 28     |       |       |                      |                         |
| Template                                                            | 1363 | .....                        | 1336   |       |       |                      |                         |
| >NM_202787.4 Arabidopsis thaliana polyubiquitin 10 (UBQ10), mRNA    |      |                              |        |       |       |                      |                         |
| product length = 61                                                 |      |                              |        |       |       |                      |                         |
| Forward primer                                                      | 1    | GGCCTTGTATAATCCCTGATGAATAAG  | 27     |       |       |                      |                         |
| Template                                                            | 1075 | .....                        | 1101   |       |       |                      |                         |
| Reverse primer                                                      | 1    | AAAGAGATAACAGGAACGGAAACATAGT | 28     |       |       |                      |                         |
| Template                                                            | 1135 | .....                        | 1108   |       |       |                      |                         |
| >NM_178970.5 Arabidopsis thaliana polyubiquitin 10 (UBQ10), mRNA    |      |                              |        |       |       |                      |                         |
| product length = 61                                                 |      |                              |        |       |       |                      |                         |
| Forward primer                                                      | 1    | GGCCTTGTATAATCCCTGATGAATAAG  | 27     |       |       |                      |                         |
| Template                                                            | 1496 | .....                        | 1522   |       |       |                      |                         |
| Reverse primer                                                      | 1    | AAAGAGATAACAGGAACGGAAACATAGT | 28     |       |       |                      |                         |
| Template                                                            | 1556 | .....                        | 1529   |       |       |                      |                         |
