# Supplementary material for: Expressing banana transcription factor MaERFVII3 in Arabidopsis confers enhanced waterlogging tolerance and root growth
Source: PeerJ journal article supplement (doi:10.7717/peerj.17285), 2024-04-30
Supplement: MaERFVII3_sequence.pdf [file MaERFVII3_sequence.pdf]

>MaERFVII3

ATGTGTGGCGGCGCCATCATCTCCGACTTCATTCCTCAACGCAACCATCACCGTCACTGCCCCGATCCCGATCACC  
TCCTCTCCGCCTCTGACCTCTGGCCCCGATTCCCTCCACCCACACAGTGTCTCCACCCAGGACAAAGTGCCTCGGA  
AGCGGGGGCGGAAGAATTTGTACAGGGGGATACGACAGCGGCCGTGGGGAAAGTGGGCAGCGGAAATCCGT  
GACCCCATGAAAGGCGTTCGCGTCTGGCTCGGCACCTTCGCTACCGCGGAGGAGGCTGCCCGCGCCTACGACC  
GCGAGGCCCGCCGCATCCGCGGCAAGAAGGCCAAGGTCAACTTCCCAATGAGGTGGAGCCCGAGGAGACCG  
ATAATCCGTCCCCTGCAACCGCTCCGCAATTCATTCAACCCAAGGTGGAAAAATCTCCCGTCTTGCGGCTT  
CCAATGACTGCGAGGGAGACGGTGAGGTGAGGAGGCTGTCGGAGGAGCTGATGGCCTACGAGTCCTACATGA  
ACTTCTTCGGTATCCCGTACATGGAGGGCGGCACTCCAGCGGCAGCGGCGGCGGAGGAGGGGACAGCAG  
CAGATGATGAGGTGGTCACAGGGAATGGAATGGAGGCGTGTAAATCCGCCGGTCTCTTCAGGCATGGAGATGCT  
TTGGATCTTCGACGACATTCTGCCGGCGTGA
