# Supplementary material for: Expressing banana transcription factor MaERFVII3 in Arabidopsis confers enhanced waterlogging tolerance and root growth
Source: PeerJ. 2024 Apr 30;12:e17285. doi: 10.7717/peerj.17285 (PMC11067909; doi:10.7717/peerj.17285)
Supplement: Supplemental Information 14 — Differences of leaf area and root length in wild-type, pCAMBIA1301, MaERFVII3-pCAMBIA1301-expressing Arabidopsis plants under well-watered and waterlogged conditions (n = 8). [file peerj-12-17285-s014.xlsx]

## Sheet: Figure 5A
	Figure 5A: Differences of leaf area in wild-type, pCAMBIA1301, MaERFVII3-pCAMBIA1301-expressing plants (n = 8) under well-watered and waterlogged conditions.
	Day 1 Well-watered								Day 3 well-watered								Day 5 well-watered								Average leaf area								Standard error
	Day	Sample	Plant	Before (mm2)	After (mm2)	Difference	Average		Day	Sample	Plant	Before (mm2)	After (mm2)	Difference	Average		Day	Sample	Plant	Before (mm2)	After (mm2)	Difference	Average			Well-watered	Waterlogged	Well-watered	Waterlogged	Well-watered	Waterlogged			Well-watered	Waterlogged	Well-watered	Waterlogged	Well-watered	Waterlogged
	1	Wildtype	1	23.099	37.358	14.259	14.5878		3	Wildtype	1	26.444	58.569	32.125	28.6792		5	WT	1	59.634	118.649	59.015	43.0412		WT	14.5878	4.748	28.6792	12.6085	43.0412	16.2227		WT	3.52144	1.59929	4.52726	3.19931	7.09872	4.64506
	Well Watered		2	67.666	81.173	13.507	3.52144		Well Watered		2	65.177	105.006	39.829	4.52726		Well watered		2	66.527	103.892	37.365	7.09872		1301	8.71567	13.3118	21.288	17.6458	63.54	18.1362		1301	1.67925	4.11156	3.39534	5.97423	7.49943	4.5404
			3	62.393	86.345	23.952					3	41.367	61.474	20.107					3	59.339	116.985	57.646			Line 1	10.172	21.5539	28.8718	24.5291	96.6295	39.3519		G1	1.76051	5.72827	2.98845	6.18111	12.8503	14.3355
			4	58.565	77.157	18.592					4	42.706	65.362	22.656					4	36.732	57.395	20.663			Line 3	6.14438	15.5275	38.8103	18.6065	108.901	52.7777		G3	1.52525	5.15766	6.1176	2.426	15.3044	13.1041
			5	85.724	88.353	2.629				1301	1	51.645	80.277	28.632	21.288				5	82.757	123.274	40.517			Line 5	7.145	12.713	26.7334	20.2686	45.2554	40.2989		G5	1.95614	1.6897	1.62426	2.96854	5.73974	4.58397
		1301	1	78.123	88.133	10.01	8.71567				2	17.812	32.244	14.432	3.39534			1301	1	61.642	102.886	41.244	63.54		Line 6	3.33071	10.5212	27.9948	25.9992	77.6637	31.4051		G6	0.883314	2.66342	6.15324	6.33392	26.8722	6.68181
			2	24.595	36.205	11.61	1.67925				3	93.582	114.515	20.933					2	71.928	118.502	46.574	7.49943
			3	70.318	73.533	3.215					4	62.263	75.438	13.175					3	81.737	157.377	75.64
			4	53.823	58.315	4.492					5	67.521	96.789	29.268					4	85.651	167.749	82.098
			5	72.943	86.785	13.842				G1	1	82.093	132.915	50.822	28.8718				5	79.18	151.324	72.144
			6	84.356	93.481	9.125					2	102.925	148.989	46.064	2.98845			G1	1	103.269	200.785	97.516	96.6295
		G1	1	55.403	68.785	13.382	10.172				3	89.756	111.925	22.169					2	190.05	356.001	165.951	12.8503
			2	89.041	104.999	15.958	1.76051				4	88.447	120.997	32.55					3	26.086	259.462	233.376
			3	54.565	70.096	15.531					5	132.412	154.725	22.313					4	34.562	52.812	18.25
			4	113.565	122.542	8.977					6	104.018	124.433	20.415					5	79.122	128.665	49.543
			5	87.578	98.095	10.517					7	63.719	97.375	33.656					6	97.228	195.978	98.75
			6	118.519	121.079	2.56					8	114.8	155.2	40.4					7	63.98	191.315	127.335
			7	67.535	88.02	20.485					9	40.601	53.698	13.097					8	54.671	110.639	55.968
			8	71.483	86.938	15.455					10	48.623	59.65	11.027					9	80.724	162.923	82.199
			9	112.254	136.26	24.006					11	64.265	86.42	22.155					10	98.734	118.955	20.221
			10	66.743	90.581	23.838					12	152.295	175.169	22.874					11	91.62	162.362	70.742
			11	47.508	53.132	5.624					13	70.821	96.743	25.922					12	109.998	287.935	177.937
			12	78.448	82.548	4.1					14	73.423	103.658	30.235					13	153.581	221.102	67.521
			13	89.575	97.378	7.803					15	67.601	106.979	39.378					14	122.897	212.915	90.018
		G3	1	117.928	129.096	11.168	6.14438			G3	1	134.956	194.157	59.201	38.8103				15	79.474	232.687	153.213
			2	104.734	115.037	10.303	1.52525				2	42.197	62.798	20.601	6.1176				16	170.566	232.687	62.121
			3	140.221	150.836	10.615					3	56.976	80.971	23.995					17	156.177	241.652	85.475
			4	58.759	59.439	0.68					4	155.195	185.041	29.846					18	131.838	241.652	109.814
			5	35.998	36.522	0.524					5	182.282	219.033	36.751					19	129.659	238.375	108.716
			6	90.561	100.255	9.694					6	73.791	91.834	18.043					20	76.686	134.61	57.924
			9	140.136	145.663	5.527					7	62.826	95.446	32.62				g3	1	158.299	277.588	119.289	108.901
		G5	1	67.466	76.501	9.035	7.145				8	109.127	175.767	66.64					2	70.538	125.863	55.325	15.3044
			2	29.354	30.182	0.828	1.95614				9	49.16	68.114	18.954					3	91.508	179.224	87.716
			3	90.901	109.261	18.36					10	52.743	76.753	24.01					4	169.378	320.999	151.621
			4	80.959	82.866	1.907					11	69.082	86.229	17.147					5	86.288	240.988	154.7
			5	59.694	75.501	15.807					12	210.828	309.423	98.595					6	75.982	182.481	106.499
			6	67.177	68.965	1.788					13	125.176	179.913	54.737					7	222.323	416.359	194.036
			7	52.053	56.669	4.616					14	79.223	127.589	48.366					8	206.93	270.732	63.802
			8	65.375	66.927	1.552					15	99.635	132.284	32.649					9	183.314	319.423	136.109
			9	84.036	93.505	9.469				G5	1	38.875	54.92	16.045	26.7334				10	118.947	138.861	19.914
			10	65.467	73.555	8.088					2	36.446	65.185	28.739	1.62426			G5	1	56.307	96.393	40.086	45.2554
			1	47.975	49.688	1.713	3.33071				3	29.66	48.882	19.222					2	110.854	123.149	12.295	5.73974
			2	154.173	158.339	4.166	0.883314				4	63.834	102.738	38.904					3	80.437	97.161	16.724
				66.759	69.371	2.612					5	74.372	113.089	38.717					4	62.539	86.277	23.738
				88.431	89.011	0.58					6	88.059	121.442	33.383					5	38.828	67.848	29.02
											7	30.479	55.984	25.505					6	59.702	92.285	32.583
											8	69.685	82.725	13.04					7	67.247	119.098	51.851
											9	88.476	119.674	31.198					8	111.175	180.491	69.316
											10	99.086	131.363	32.277					9	54.505	86.654	32.149
											11	87.541	106.95	19.409					10	81.15	118.217	37.067
											12	113.42	138.134	24.714					11	77.67	134.285	56.615
											13	73.308	101.228	27.92					12	58.71	123.736	65.026
											14	77.895	104.089	26.194					13	63.475	118.636	55.161
											15	66.551	104.377	37.826					14	54.211	87.116	32.905
											16	56.142	91.395	35.253					15	69.818	118.902	49.084
											17	118.121	140.981	22.86					16	30.082	59.353	29.271
											18	81.978	99.791	17.813					17	52.283	105.07	52.787
											19	23.909	38.832	14.923					18	68.714	92.229	23.515
											20	127.006	152.252	25.246					19	51.166	178.157	126.991
											21	84.264	116.497	32.233					20	64.872	96.714	31.842
											22	57.479	95.262	37.783					21	55.525	78.118	22.593
											23	41.089	63.014	21.925					22	108.032	218.383	110.351
											24	99.129	119.602	20.473					23	74.75	143.06	68.31
										G6	1	144.194	187.168	42.974	27.9948				24	59.144	104.217	45.073
											2	114.997	152.138	37.141	6.15324				25	36.146	53.178	17.032
											3	72.771	105.69	32.919				G6	1	115.668	199.83	84.162	77.6637
											4	63.112	75.351	12.239					2	39.003	49.724	10.721	26.8722
											5	48.441	63.142	14.701					3	94.168	111.482	17.314
																			4	85.795	148.603	62.808
																			5	110.986	136.92	25.934
																			6	60.664	95.276	34.612
																			7	154.015	324.833	170.818
																			8	22.098	237.039	214.941
	Day 1 waterlogged
	Day	Sample	Plant	Before (mm2)	After (mm2)	Difference	Average		Day	Sample	Plant	Before (mm2)	After (mm2)	Difference	Average		Day	Sample	Plant	Before (mm2)	After (mm2)	Difference	Average
	1	Wildtype	1	32.172	34.021	1.849	4.748		3	Wildtype	1	66.695	72.236	5.541	12.6085		5	Wildtype	1	41.836	49.368	7.532	16.2227
	Waterlogged		2	82.936	87.963	5.027	1.59929		Waterlogged		2	82.894	86.111	3.217	3.19931		Waterlogged		2	72.655	105.069	32.414	4.64506
			3	71.234	78.602	7.368					3	108.546	123.639	15.093					3	115.873	146.453	30.58
		1301	1	68.79	84.422	15.632	13.3118				4	25.751	50.184	24.433					4	51.173	68.819	17.646
			2	57.451	58.068	0.617	4.11156				5	25.581	36.054	10.473					5	25.333	29.621	4.288
			3	105.729	135.785	30.056					6	33.489	50.383	16.894					6	63.783	90.809	27.026
			4	35.252	49.238	13.986				1301	1	40.601	69.542	28.941	17.6458				7	86.944	84.546	0
			5	136.868	150.84	13.972					2	82.823	85.217	0	5.97423				8	26.856	32.287	5.431
			6	54.064	59.672	5.608					3	84.176	100.372	16.196					9	23.118	44.205	21.087
		G1	1	52.787	57.002	4.215	21.5539				4	56.38	88.043	31.663				1301	1	63.35	82.058	18.708	18.1362
			2	60.693	122.115	61.422	5.72827				8	83.864	87.552	3.688					2	67.106	86.933	19.827	4.5404
			3	77.117	88.552	11.435					9	90.541	115.928	25.387					3	79.379	83.858	4.479
			4	101.446	109.046	7.6				G1	1	128.752	141.938	13.186	24.5291				4	80.952	88.563	7.611
			5	93.643	96.239	2.596					2	84.463	118.359	33.896	6.18111				5	94.586	119.175	24.589
			6	74.404	87.21	12.806					6	69.264	85.244	15.98					6	132.894	166.497	33.603
			7	58.592	66.571	7.979					9	34.993	45.776	10.783				G1	1	122.056	133.612	11.556	39.3519
			8	42.095	69.78	27.685					12	51.513	107.846	56.333					2	110.731	175.673	64.942	14.3355
			9	60.08	112.648	52.568					16	44.679	72.013	27.334					4	75.329	188.309	112.98
			10	87.21	114.443	27.233					19	65.9	80.092	14.192					6	57.473	86.217	28.744
		G3	1	29.079	31.18	2.101	15.5275			G3	1	86.003	101.515	15.512	18.6065				7	57.204	78.298	21.094
			2	41.644	49.399	7.755	5.15766				2	123.033	140.804	17.771	2.426				9	106.334	136.517	30.183
			3	63.998	81.57	17.572					3	115.98	146.659	30.679					10	109.484	165.672	56.188
			4	104.003	119.699	15.696					4	84.818	100.303	15.485					11	123.354	151.3	27.946
			5	105.338	121.918	16.58					5	215.827	222.743	6.916					12	29.964	41.341	11.377
			6	139.834	140.957	1.123					6	147.581	182.889	35.308					15	103.815	126.272	22.457
			7	230.334	230.77	0.436					7	90.728	117.454	26.726					16	67.462	142.61	75.148
			8	119.21	144.365	25.155					8	93.277	111.158	17.881					17	66.459	103.995	37.536
			9	245.607	316.33	70.723					11	51.811	63.176	11.365					19	101.437	139.512	38.075
			10	96.261	106.13	9.869					13	78.509	94.572	16.063					20	69.531	82.232	12.701
			11	70.577	74.369	3.792					17	121.462	132.428	10.966				G3	1	72.434	101.336	28.902	52.7777
		G5	1	71.822	83.783	11.961	12.713			G5	1	103.04	116.166	13.126	20.2686				2	224.851	289.749	64.898	13.1041
			2	31.477	33.927	2.45	1.6897				2	57.019	83.387	26.368	2.96854				3	105.4	127.317	21.917
			3	89.223	113.422	24.199					3	38.315	52.318	14.003					4	72.461	94.214	21.753
			4	74.637	76.125	1.488					4	34.16	61.404	27.244					5	133.075	234.921	101.846
			5	71.282	79.801	8.519					5	38.487	59.089	20.602					6	109.67	148.174	38.504
			6	64.748	77.525	12.777				G6	1	174.401	186.291	11.89	25.9992				7	125.623	166.289	40.666
			7	32.644	36.188	3.544					2	83.298	126.176	42.878	6.33392				8	132.841	179.17	46.329
			8	32.629	33.081	0.452					3	278.324	314.642	36.318					9	94.448	148.009	53.561
			9	75.804	98.485	22.681					4	55.432	66.941	11.509					10	109.656	113.583	3.927
			10	47.726	76.387	28.661					5	79.196	106.597	27.401					11	195.88	335.94	140.06
			11	89.777	104.903	15.126													12	91.72	155.365	63.645
			12	65.696	82.003	16.307													13	167.488	219.203	51.715
			13	85.125	96.37	11.245													14	219.74	280.905	61.165
			14	52.743	70.611	17.868												G5	1	34.16	61.404	27.244	40.2989
			15	82.791	100.338	17.547													2	46.064	69.786	23.722	4.58397
			16	55.952	58.461	2.509													3	58.399	127.898	69.499
			17	37.997	48.499	10.502													4	35.583	116.137	80.554
			18	65.798	76.008	10.21													5	107.209	189.661	82.452
			19	122.523	139.472	16.949													6	111.379	146.099	34.72
			20	71.895	77.467	5.572													7	31.04	50.823	19.783
			21	78.663	98.821	20.158													8	31.385	55.984	24.599
			22	70.101	89.063	18.962													9	61.677	80.842	19.165
		G6	1	102.029	108.171	6.142	10.5212												10	49.371	70.03	20.659
			2	115.165	126.06	10.895	2.66342												11	31.687	66.939	35.252
			3	37.721	59.675	21.954													12	58.989	104.679	45.69
			4	183.568	195.345	11.777													13	68.391	95.708	27.317
			5	231.123	232.961	1.838													14	74.789	126.431	51.642
																			15	41.391	67.342	25.951
																			16	79.965	115.965	36
																		G6	1	60.946	121.779	60.833	31.4051
																			2	145.451	157.938	12.487	6.68181
																			3	76.36	112.095	35.735
																			4	71.068	103.949	32.881
																			5	63.798	108.541	44.743
																			6	37.511	51.562	14.051
																			7	111.669	130.775	19.106

## Sheet: Figure 5B
	Figure 5B: The root length of different Arabidopsis genotypes (n = 3) under well-watered and waterlogged conditions.
		Day 1	Root length
	Well watered	WTD1WW	2.338	2.3485			Day 1		Day 3		Day 5
		WTD1WW	2.359	0.0105		Root length	Well-watered	Waterlogged	Well-watered	Waterlogged	Well-watered	Waterlogged		Root length	Well-watered	Waterlogged	Well-watered	Waterlogged	Well-watered	Waterlogged
		1301 D1WW	2.849	3.1385		WT	2.3485	2.8505	5.194	2.054	3.39924	1.691		WT	0.0105	0.0245	0.233	0.262	0.182758	0.312936
		1301 D1WW	3.428	0.2895		1301	3.1385	2.751	4.509	2.651	3.96621	2.30567		1301	0.2895	0.077	0.589	0.0362537	0.108246	0.572604
		G1D1WW	4.913	4.28		Line 1	4.28	3.363	4.8555	3.71667	2.37205	3.9695		Line 1	0.633	0.164	0.7305	0.193275	0.404939	0.0905
		G1D1WW	3.647	0.633		Line 3	4.384	4.279	4.935	5.099	6.48694	5.085		Line 3	0.39608	0.022	0.399	0.907	0.0184287	0.182188
		G3D1WW	5.041	4.384		Line 5	4.042	6.0365	4.9985	6.0805	5.62187	3.0935		Line 5	0.0223333	1.7515	1.7145	0.1165	0.304177	0.2975
		G3D1WW	3.727	0.39608		Line 6	4.393	5.044	7.317	4.259	5.84542	3.367		Line 6	0.418	0.0275	1.932	0.474	0.983288	0.131584
		G5D1WW	4.042	4.042
		G5D1WW	4.042	0.0223333
		G6D1WW	3.975	4.393
		G6D1WW	4.811	0.418
	Waterlogged	WTD1W	2.875	2.8505
		WTD1W	2.826	0.0245
		1301 D1W	2.674	2.751
		1301 D1W	2.828	0.077
		G1D1W	3.199	3.363
		G1D1W	3.527	0.164
		G3D1W	4.301	4.279
		G3D1W	4.257	0.022
		G5D1W	7.788	6.0365
		G5D1W	4.285	1.7515
		G6D1W	5.044	5.044
		G6D1W	5.099	0.0275
		Day 3
	Well watered	WTD3WW	4.961	5.194
		WTD3WW	5.427	0.233
		1301 D3WW	5.098	4.509
		1301 D3WW	3.92	0.589
		G1D3WW	4.125	4.8555
		G1D3WW	5.586	0.7305
		G3D3WW	4.536	4.935
		G3D1WW	5.334	0.399
		G5D1WW	3.284	4.9985
		G5D1WW	6.713	1.7145
		G6D1WW	9.249	7.317
		G6D1WW	5.385	1.932
	Waterlogged	WTD3W	2.316	2.054
		WTD3W	1.792	0.262
		1301 D3W	2.592	2.651
		1301 D3W	2.717	0.0362537
		1301 D3W	2.644
		G1D3W	4.088	3.71667
		G1D3W	3.624	0.193275
		G1D3W	3.438
		G3D3W	6.006	5.099
		G3D3W	4.192	0.907
		G5D3W	5.964	6.0805
		G5D3W	6.197	0.1165
		G6D3W	4.733	4.259
		G6D3W	3.785	0.474
		Day 5
	Well watered	WTD5WW	3.32268	3.39924
		WTD5WW	3.4758	0.182758
		WTD5WW	2.86725
		1301 D5WW	3.85797	3.96621
		1301 D5WW	4.07446	0.108246
		G1D5WW	1.96712	2.37205
		G1D5WW	2.77699	0.404939
		G1D5WW	3.2915
		G3D5WW	6.50537	6.48694
		G3D5WW	6.46852	0.0184287
		G5D5WW	5.3177	5.62187
		G5D5WW	5.92605	0.304177
		G6D5WW	6.82871	5.84542
		G6D5WW	4.86213	0.983288
	Waterlogged	WTD5W	1.934	1.691
		WTD5W	1.07	0.312936
		WTD5W	2.069
		1301 D5W	1.845	2.30567
		1301 D5W	1.628	0.572604
		1301 D5W	3.444
		G1D5W	3.879	3.9695
		G1D5W	4.06	0.0905
		G3DW	4.766	5.085
		G3D5W	5.092	0.182188
		G3D5W	5.397
		G5D5W	2.796	3.0935
		G5D5W	3.391	0.2975
		G6D5W	3.618	3.367
		G6D5W	3.31	0.131584
		G6D5W	3.173
