# Supplementary material for: Expressing banana transcription factor MaERFVII3 in Arabidopsis confers enhanced waterlogging tolerance and root growth
Source: PeerJ. 2024 Apr 30;12:e17285. doi: 10.7717/peerj.17285 (PMC11067909; doi:10.7717/peerj.17285)
Supplement: Supplemental Information 15 — Gene expression of Arabidopsis plants for 1, 3, and 5 days of waterlogging. (A) AtRAP2.12, (B) AtRAP2.2, (C) AtHRE2, (D) AtADH1, (E) AtPIN1, (F) AtLBD16, and (G) AtLBD18. Error bars indicate standard error between three biological replicates. Asterisks (*) indicate a significant difference between well-watered and waterlogged samples at p < 0.05. Different capital letters indicate a significant difference between time points within well-watered samples, while different lowercase letters indicate a significant difference within waterlogged samples (p < 0.05). (WT: Wild-type, 1301: pCAMBIA1301, Line 1: MaERFVII3-Line 1, and Line 5: MaERFVII3-Line 5) [file peerj-12-17285-s015.xlsx]

## Sheet: WT
		Gene			TUB					UBQ						RAP2.12								RAP2.2						ADH1
		Sample			Ct	ΔCt	RQ			Ct	ΔCt	RQ	Geo Mean			Ct	ΔCt	RQ	Relative expression	Average	Ct			ΔCt	RQ	Relative expression	Average			Ct	ΔCt	RQ	Relative expression	Average
	D1WW	WT(1)	19.41	19.54	19.475	0.351667	1.27115	21.29	20.84	21.065	-0.276667	0.828246	1.02607	21.26	21.26	21.26	0.226667	1.1649	1.1353	1.00579	21.44	21.93	21.685	0.241667	1.15285	1.12356	1.00639	23.3	24.26	23.78	1.13	1.89932	1.85106	0.829343
	D1WW	WT (2)	20.17	20.1	20.135	-0.308333	0.810295	21.01	20.87	20.94	-0.151667	0.901853	0.854849	21.26	22.15	21.705	-0.218333	0.863271	1.00985		22.27	21.84	22.055	-0.128333	0.92725	1.08469		28.3	28.21	28.255	-3.345	0.149726	0.175149
	D1WW	WT (3)	20.27	19.47	19.87	-0.0433333	0.970869	20.45	20.27	20.36	0.428333	1.33877	1.14007	21.91	21.08	21.495	-0.00833333	0.994404	0.872228		22.07	22.05	22.06	-0.133333	0.924525	0.810935		25.68	26.04	26.04	-1.13	0.526503	0.461815
	D1W	WT(1)	20.46	19.84	20.15	-0.323333	0.802045	20.75	19.83	20.29	0.498333	1.40414	1.06122	21.13	21.14	21.135	0.351667	1.2672	1.1941	0.553028	20.75	20.78	20.765	1.16167	1.98123	1.86693	0.821157	22.3	22.39	22.345	2.565	4.28939	4.04194	10.8125
	D1W	WT (2)	26.06	26.02	26.04	-6.21333	0.0144224	22.23	22.04	22.135	-1.34667	0.399617	0.0759174	29.3	28.55	28.55	-7.06333	0.00859587	0.113227		29.83	28.05	28.94	-7.01333	0.0161184	0.212315		25.33	25.45	25.39	-0.48	0.761477	10.0303
	D1W	WT (3)	23.62	22.39	23.005	-3.17833	0.114363	20.96	20.94	20.95	-0.161667	0.895731	0.32006	25.02	24.44	24.73	-3.24333	0.112582	0.351753		25.215	25.76	25.4875	-3.56083	0.122974	0.384223		21.75	21.83	21.79	3.12	5.87799	18.3653
	Primer efficiency				97.83					97.61						96.09							80.14							76.42
	Converted primer efficiency				1.9783					1.9761						1.9609							1.8014							1.7642
	Average Ct (control)				19.8267					20.7883						21.4867							21.9267							24.91
		Gene			TUB					UBQ						RAP2.12								RAP2.2						ADH1
		Sample			Ct	ΔCt	RQ			Ct	ΔCt	RQ	Geo Mean			Ct	ΔCt	RQ	Relative expression	Average	Ct			ΔCt	RQ	Relative expression	Average			Ct	ΔCt	RQ	Relative expression	Average
	D3WW	WT(1)	21.13	21.97	21.13	-0.783333	0.586009	22.57	22.57	22.57	-1.57	0.343226	0.448479	21.55	21.98	21.765	-0.113333	0.926521	2.06592	0.697712	22.63	22.46	22.545	-0.31	0.833222	1.85788	0.735757	29.71	29.71	29.71	-2.04167	0.313785	0.699664	1.18804
	D3WW	WT (2)	20.67	20.6	20.635	-0.288333	0.821427	20.81	20.88	20.845	0.155	1.11135	0.955454	22.35	22.39	22.37	-0.718333	0.616481	0.645223		22.68	22.74	22.71	-0.475	0.75611	0.791362		28.1	28.95	28.525	-0.856667	0.61488	0.643548
	D3WW	WT (3)	19.2	19.35	19.275	1.07167	2.07743	19.6	19.57	19.585	1.415	2.62162	2.33372	20.79	20.85	20.82	0.831667	1.75076	0.750201		21.4	21.5	21.45	0.785	1.58728	0.680152		24.57	24.97	24.77	2.89833	5.18296	2.2209
	D3W	WT(1)	20.6	20.6	20.6	-0.253333	0.841278	20.16	20.23	20.195	0.805	1.73032	1.20652	21.49	21.44	21.465	0.186667	1.13394	0.939851	1.10596	21.55	21.55	21.55	0.685	1.49656	1.2404	1.96305	21.73	20.53	21.13	6.53833	40.9272	33.9218	37.8621
	D3W	WT (2)	20.02	21.52	20.77	-0.423333	0.749152	21.78	22.4	22.09	-1.09	0.475958	0.59713	21.8	22.32	22.06	-0.408333	0.759593	1.27207		21.405	21.46	21.4325	0.8025	1.60371	2.6857		20.19		20.19	7.47833	69.7858	116.869
	D3W	WT (3)	19.32	19.51	19.415	0.931667	1.88819	20.05	20.04	20.045	0.955	1.91645	1.90227	22	22.6	22.3	-0.648333	0.646236	0.339719		21.72	21.72	21.72	0.515	1.35406	0.711816		19.96	19.96	19.96	7.70833	79.5193	41.8024
	Primer efficiency				97.83					97.61						96.09							80.14							76.42
	Converted primer efficiency				1.9783					1.9761						1.9609							1.8014							1.7642
	Average Ct (control)				20.3467					21						21.6517							22.235							27.6683
		Gene			TUB					UBQ						RAP2.12								RAP2.2						ADH1
		Sample			Ct	ΔCt	RQ			Ct	ΔCt	RQ	Geo Mean			Ct	ΔCt	RQ	Relative expression	Average	Ct			ΔCt	RQ	Relative expression	Average			Ct	ΔCt	RQ	Relative expression	Average
	D5WW	WT(1)	19.8	19.67	19.735	1.08833	2.10119	19.74	19.83	19.785	0.776667	1.69725	1.88845	21.45	21.29	21.37	1.365	2.50727	1.19327	1.12072	22.05	21.94	21.995	1.365	2.2331	1.06278	1.15662	26.9	26.83	26.865	1.13167	1.90112	1.00671	1.00245
	D5WW	WT (2)	22.56	22.43	22.495	-1.67167	0.319667	20.86	21.32	21.09	-0.528333	0.697773	0.472287	24.52	24.88	24.7	-1.965	0.266272	0.832965		25.9	25.64	25.77	-2.41	0.242091	0.757323		29.61	29.34	29.475	-1.47833	0.432036	0.914774
	D5WW	WT (3)	20.38	20.1	20.24	0.583333	1.4888	20.81	20.01	20.81	-0.248333	0.844386	1.12122	22.37	21.9	22.135	0.6	1.49787	1.33593		22.29	22.34	22.315	1.045	1.84975	1.64977		27.85	27.45	27.65	0.346667	1.2175	1.08588
	D5W	WT(1)	21.65	21.27	21.46	-0.636667	0.64768	22.57	22.78	22.675	-2.11333	0.237059	0.39184	22.67	22.93	22.8	-0.065	0.957173	2.44276	1.84426	22.25	22.6	22.425	0.935	1.73379	4.42473	3.19441	21.93	22.86	22.395	5.60167	24.048	61.3719	45.7122
	D5W	WT (2)	22.87	21.72	21.72	-0.896667	0.542406	23.2		23.2	-2.63833	0.16579	0.299876	22.64	22.96	22.8	-0.065	0.957173	1.76468		23.18	23.65	23.415	-0.055	0.968147	3.2285		23.27	23.17	23.22	4.77667	15.0549	50.2037
	D5W	WT (3)	19.64	20.89	20.265	0.558333	1.46362	20.9		20.9	-0.338333	0.794178	1.07814	22.13	22.28	22.205	0.53	1.4289	1.32534		22.05	22.18	22.115	1.245	2.08082	1.93002		22.08	22.23	22.155	5.84167	27.5582	25.5609
	Primer efficiency				97.83					97.61						96.09							80.14							76.42
	Converted primer efficiency				1.9783					1.9761						1.9609							1.8014							1.7642
	Average Ct (control)				20.8233					20.5617						22.735							23.36							27.9967
		Gene			TUB					UBQ							HRE2								PIN								LBD16								LBD18
		Sample			Ct	ΔCt	RQ			Ct	ΔCt	RQ	Geo Mean				Ct	ΔCt	RQ	Relative expression	Average				Ct	ΔCt	RQ	Relative expression	Average				Ct	ΔCt	RQ	Relative expression	Average				Ct	ΔCt	RQ	Relative expression	Average
	D1WW	WT (1)	20.79	20.85	20.82	0.436667	1.34704	23.06	22.99	23.025	0.0616667	1.0429	1.18525	27.55	27.64		27.595	1.59167	3.01397	2.54289	1.41298	28.02	27.8		27.91	0.365	1.22482	1.03339	1.02192	31.18	30.32		30.75	-1.035	0.464533	0.391928	1.80427	30.51	30.26		30.385	-0.761667	0.59524	0.502205	1.25805
	D1WW	WT (2)	22.13	22.13	22.13	-0.873333	0.55111	23.86	24.24	24.05	-0.963333	0.518845	0.534734	28.79	30.38		29.585	-0.398333	0.758734	1.4189		29.03	28.91		28.97	-0.695	0.67967	1.27104		31.32	31.3		31.31	-1.595	0.306798	0.573739		31.03	30.68		30.855	-1.23167	0.432177	0.80821
	D1WW	WT(3)	20.96	20.68	20.82	0.436667	1.34704	22.11	22.26	22.185	0.901667	1.84808	1.5778	27.96	32.8		30.38	-1.19333	0.437291	0.277153		27.78	28.11		27.945	0.33	1.20124	0.761337		26.94	27.23		27.085	2.63	7.01666	4.44713		27.63	27.63		27.63	1.99333	3.88728	2.46374
	D1W	WT (1)	20.37	19.98	20.175	1.08167	2.09165	20.82	20.74	20.78	2.30667	4.81208	3.17257	32.63	34.77		33.7	-4.51333	0.0437876	0.0138019	13.2539	26.94	27.25		27.095	1.18	1.92633	0.607183	0.685299	25.07	25.11		25.09	4.625	30.7587	9.69519	6.56195	25.74	25.84		25.79	3.83333	13.6124	4.29065	2.6324
	D1W	WT (2)	20.04	20.04	20.04	1.21667	2.29345	20.88	20.5	20.5	2.58667	5.82316	3.65447	23.94	22.38		23.16	6.02667	65.194	17.8395		25.26	25.42		25.34	2.935	5.10749	1.3976		25.05	24.69		24.87	4.845	36.2031	9.90655		25.92			25.92	3.70333	12.4589	3.40922
	D1W	WT (3)	22.21	21.86	22.035	-0.778333	0.588012	20.94	20.73	20.835	2.25167	4.63514	1.65091	24.01	25.03		24.01	5.17667	36.1686	21.9082		32.68	32.77		32.725	-4.45	0.0843775	0.0511096		31.79	32.97		32.38	-2.665	0.13887	0.0841172		31.07	31.47		31.27	-1.64667	0.325763	0.197323
	Primer efficiency				97.83					97.61							100								74.3								109.76								97.61
	Converted primer efficiency				1.9783					1.9761							2								1.743								2.0976								1.9761
	Average Ct (control)				21.2567					23.0867							29.1867								28.275								29.715								29.6233
		Gene			TUB					UBQ							HRE2								PIN								LBD16								LBD18
		Sample			Ct	ΔCt	RQ			Ct	ΔCt	RQ	Geo Mean				Ct	ΔCt	RQ	Relative expression	Average				Ct	ΔCt	RQ	Relative expression	Average				Ct	ΔCt	RQ	Relative expression	Average				Ct	ΔCt	RQ	Relative expression	Average
	D3WW	WT (1)	22.93	23.04	22.985	-1.03833	0.492436	22.84	23.15	22.995	-0.296667	0.81704	0.634303	31.6	32.44		32.02	-0.445	0.734584	1.1581	0.744349	26.96	26.78		26.87	-0.968333	0.583907	0.920549	1.04742	28.51	29.08		28.795	-0.806667	0.550145	0.867322	1.01479	29.58	30		29.79	0.505	1.41053	2.22375	1.19352
	D3WW	WT (2)	21.24	21.48	21.36	0.586667	1.49219	22.34	22.51	22.425	0.273333	1.20463	1.34072	31.13	31.13		31.13	0.445	1.36131	1.01536		25.03	24.27		24.65	1.25167	2.00458	1.49515		27.99	27.45		27.72	0.268333	1.21991	0.909891		30.6	30.75		30.675	-0.38	0.771956	0.575775
	D3WW	WT(3)	21.55	21.44	21.495	0.451667	1.3609	22.47	22.88	22.675	0.0233333	1.01602	1.17588	35.41			35.41	-3.835	0.0700729	0.0595918		27.12	25.25		26.185	-0.283333	0.854343	0.726555		27.39	27.51		27.45	0.538333	1.49003	1.26716		29.9	30.94		30.42	-0.125	0.918383	0.781016
	D3W	WT (1)	22.78	22.77	22.775	-0.828333	0.568292	22.25	22.14	22.195	0.503333	1.40893	0.89481	25.48	24.8		25.14	6.435	86.5223	96.6935	84.1658	25.53	26.03		25.78	0.121667	1.06994	1.19571	0.841549	30.65	30.44		30.545	-2.55667	0.150474	0.168163	0.141204	30.75	31.3		31.025	-0.73	0.608218	0.679718	0.409855
	D3W	WT (2)	22.19	21.98	22.085	-0.138333	0.90994	21.95	21.93	21.94	0.758333	1.67618	1.235	25.48	24.44		24.96	6.615	98.0197	79.3681		25.3	25.38		25.34	0.561667	1.36625	1.10627		29.72	29.92		29.82	-1.83167	0.257461	0.20847		31.2			31.2	-0.905	0.539875	0.437145
	D1W	WT (3)	21.97	21.97	21.97	-0.0233333	0.984207	21.91	22.02	21.965	0.733333	1.64788	1.27352	24.88	25.06		24.97	6.605	97.3426	76.4358		27.41	28.93		28.17	-2.26833	0.283568	0.222664		31.63	31.95		31.79	-3.80167	0.0598298	0.0469798		32.36	33.93		33.145	-2.85	0.143531	0.112704
	Primer efficiency				97.83					97.61							100								74.3								109.76								97.61
	Converted primer efficiency				1.9783					1.9761							2								1.743								2.0976								1.9761
	Average Ct (control)				21.9467					22.6983							31.575								25.9017								27.9883								30.295
		Gene			TUB					UBQ							HRE2								PIN								LBD16								LBD18
		Sample			Ct	ΔCt	RQ			Ct	ΔCt	RQ	Geo Mean				Ct	ΔCt	RQ	Relative expression	Average				Ct	ΔCt	RQ	Relative expression	Average				Ct	ΔCt	RQ	Relative expression	Average				Ct	ΔCt	RQ	Relative expression	Average
	D3WW	WT (1)	21.64	21.86	21.75	1.14667	2.18649	21.27	21.23	21.25	0.856667	1.7923	1.97961	30.57	30.7		30.635	-0.125	0.917004	0.463225	1.54302	27.59	27.71		27.65	2.635	4.32333	2.18393	1.29214	31.75	32.61		32.18	-0.0233333	0.982863	0.496494	2.1577	30.72	30.47		30.595	0.505	1.41053	0.712532	1.23343
	D3WW	WT (2)	24.7	24.85	24.775	-1.87833	0.277629	23	23.97	23.485	-1.37833	0.39109	0.329512	30.28			30.28	0.23	1.17283	3.55931		33.56	34.91		34.235	-3.95	0.111397	0.338068		34.89	35.19		35.04	-2.88333	0.118132	0.358505		33.13	33.91		33.52	-2.42	0.192372	0.58381
	D3WW	WT(3)	22.38	21.95	22.165	0.731667	1.64735	21.75	21.42	21.585	0.521667	1.42664	1.53303	31.06	30.17		30.615	-0.105	0.929805	0.606515		28.95	28.99		28.97	1.315	2.07638	1.35443		29.16	29.34		29.25	2.90667	8.61272	5.61811		29.1	29.27		29.185	1.915	3.68531	2.40394
	D3W	WT (1)	22.85	22.98	22.915	-0.0183333	0.98757	24.16	24.79	24.475	-2.36833	0.199263	0.443606	26.93	29.05		27.99	2.52	5.73582	12.93	9.49557	28.22	28.24		28.23	2.055	3.13232	7.06105	5.53438	29.14	28.98		29.06	3.09667	9.91443	22.3497	14.5783	28.75	28.73		28.74	2.36	4.9901	11.249	6.64564
	D3W	WT (2)	23.58		23.58	-0.683333	0.627384	23.19	23.17	23.18	-1.07333	0.481392	0.549561	28.94	29.34		29.14	1.37	2.58471	4.70322		27.92	27.84		27.88	2.405	3.8047	6.92316		28.9	28.88		28.89	3.26667	11.245	20.4618		29.02			29.02	2.08	4.12366	7.50354
	D1W	WT (3)	24.3	21.9	23.1	-0.203333	0.87047	21.72		21.72	0.386667	1.30131	1.06431	26.27	27.69		26.98	3.53	11.5514	10.8535		28.08	28.8		28.44	1.845	2.78736	2.61895		32.39	31.97		32.18	-0.0233333	0.982863	0.923478		30.92	30.6		30.76	0.34	1.26059	1.18443
	Primer efficiency				97.83					97.61							100								74.3								109.76								97.61
	Converted primer efficiency				1.9783					1.9761							2								1.743								2.0976								1.9761
	Average Ct (control)				22.8967					22.1067							30.51								30.285								32.1567								31.1

## Sheet: 1301
		Gene			TUB					UBQ						RAP2.12								RAP2.2						ADH1
		Sample			Ct	ΔCt	RQ			Ct	ΔCt	RQ	Geo Mean			Ct	ΔCt	RQ	Relative expression	Average			Ct	ΔCt	RQ	Relative expression	Average			Ct	ΔCt	RQ	Relative expression	Average
	D1WW	1301 (1)	21.01	21.15	21.08	1.01333	1.99638	20.75	19.83	20.29	3.14333	8.50797	4.1213	21.93	22.4	22.165	0.253333	1.18601	0.594081	1.16283	23.72	23.18	23.45	-0.3	0.838141	0.419831	1.16917	29.6	31.07	30.335	-0.738333	0.657606	0.159563	1.73933
	D1WW	1301 (2)	23.72	21.13	22.425	-0.331667	0.797498	24.38		24.38	-0.946667	0.524768	0.646917	21.99	22.77	22.38	0.0383333	1.02615	1.58622		22.84	22.02	22.84	0.31	1.20016	1.50491		29	27.83	29	0.596667	1.40316	2.16899
	D1WW	1301 (3)	21.98	23.57	22.775	-0.681667	0.628098	25.34	25.92	25.63	-2.19667	0.223979	0.375074	22.77	22.65	22.71	-0.291667	0.821676	1.3082		23.24	23.08	23.16	-0.01	0.994132	1.58276		28.93	29.98	29.455	0.141667	1.08375	2.88942
	D1W	1301 (1)	22.2	21.62	21.91	0.183333	1.13324	21.85	22.61	22.23	1.20333	2.26964	1.60376	21.91	22.37	22.14	0.278333	1.20615	0.752076	0.661703	24.65	24.37	24.51	-1.36	0.449128	0.396324	0.350958	24.34	24.73	24.535	5.06167	17.6988	11.0358	10.3825
	D1W	1301 (2)	20.94	20.07	20.505	1.58833	2.95536	20.88	20.23	20.555	2.87833	7.10292	4.58167	21.49	21.58	21.535	0.883333	1.81274	0.613373		22.41	22.45	22.43	0.72	1.5277	0.333438		23.91	22.88	23.395	6.20167	33.8071	7.37877
	D1W	1301 (3)	22.2	21.62	21.91	0.183333	1.13324	21.85	22.65	22.65	0.783333	1.70497	1.39001	22.91	22.37	22.64	-0.221667	0.861336	0.61966		24.65	24.37	24.51	-1.36	0.449128	0.323111		24.34	24.73	24.535	5.06167	17.6988	12.7328
	Primer efficiency				97.83					97.61						96.09							80.14							76.42
	Converted primer efficiency				1.9783					1.9761						1.9609							1.8014							1.7642
	Average Ct (control)				22.0933					23.4333						22.4183							23.15							29.5967
		Gene			TUB					UBQ						RAP2.12								RAP2.2						ADH1
		Sample			Ct	ΔCt	RQ			Ct	ΔCt	RQ	Geo Mean			Ct	ΔCt	RQ	Relative expression	Average			Ct	ΔCt	RQ	Relative expression	Average			Ct	ΔCt	RQ	Relative expression	Average
	D3WW	1301 (1)	20.67	20.6	20.635	-0.961667	0.518879	20.81	20.88	20.845	-0.836667	0.565596	0.541734	22.35	22.39	22.37	-1.09667	0.47783	0.882039	1.00436	22.68	22.74	22.71	-0.881667	0.595165	1.05228	1.0064	28.1	28.95	28.95	-2.40833	0.254818	0.470375	1.1885
	D3WW	1301 (2)	19.2	19.35	19.275	0.398333	1.31227	19.6	19.57	19.585	0.423333	1.33421	1.3232	20.79	20.85	20.82	0.453333	1.357	1.02555		21.4	21.5	21.45	0.378333	1.24941	0.952101		24.57	24.97	24.77	1.77167	2.73401	2.06622
	D3WW	1301 (3)	19.11		19.11	0.563333	1.46863	19.58	19.61	19.595	0.413333	1.32516	1.39505	20.63	20.63	20.63	0.643333	1.54222	1.1055		21.33	21.32	21.325	0.503333	1.3448	1.01482		26.04	25.77	25.905	0.636667	1.43539	1.02891
	D3W	1301 (1)	21.09	21.14	21.115	-1.44167	0.373978	20.43	20.29	20.36	-0.351667	0.786998	0.542512	23.14	23.68	23.41	-2.13667	0.237203	0.437231	1.0725	23.9	23.79	23.845	-2.01667	0.305154	0.562484	1.18368	20.18	21.11	20.645	5.89667	28.4322	52.4084	54.5914
	D3W	1301 (2)	20.09	20.09	20.09	-0.416667	0.752567	21.47	21.48	21.475	-1.46667	0.368254	0.526436	22.19	22.03	22.11	-0.836667	0.569262	1.08135		22.1	22.41	22.255	-0.426667	0.777928	1.47773		19.65	19.11	19.38	7.16167	58.3033	110.751
	D1W	1301 (3)	19.48	20.94	20.21	-0.536667	0.69341	20.66	20.97	20.815	-0.806667	0.577272	0.632682	21.1	20.96	21.03	0.243333	1.17805	1.69893		21.94	21.87	21.905	-0.0766667	0.95588	1.51084		27.87	28.54	28.205	-1.66333	0.388963	0.614785
	Primer efficiency				97.83					97.61						96.09							80.14							76.42
	Converted primer efficiency				1.9783					1.9761						1.9609							1.8014							1.7642
	Average Ct (control)				19.6733					20.0083						21.2733							21.8283							26.5417
		Gene			TUB					UBQ						RAP2.12								RAP2.2						ADH1
		Sample			Ct	ΔCt	RQ			Ct	ΔCt	RQ	Geo Mean			Ct	ΔCt	RQ	Relative expression	Average			Ct	ΔCt	RQ	Relative expression	Average			Ct	ΔCt	RQ	Relative expression	Average
	D5WW	1301 (1)	19.72	19.97	19.845	0.566667	1.47197	19.05	19.01	19.03	1.38167	2.56277	1.94225	20.19	20.25	20.22	1.07333	2.06017	1.06071	0.85553	21.06	21.46	21.26	0.658333	1.47325	0.75853	1.02563	25.17	25.43	25.3	1.64167	2.53951	0.990923	1.00373
	D5WW	1301 (2)	21.07	21.23	21.15	-0.738333	0.604279	21.63	21.66	21.645	-1.23333	0.431687	0.510744	22.52	23.34	22.93	-1.63667	0.33216	0.650346		23.21	22.91	23.06	-1.14167	0.510715	0.999943		29.17	29.49	29.33	-2.38833	0.257728	0.504613
	D5WW	1301 (3)	20.5	19.98	20.24	0.171667	1.12425	20.73	20.39	20.56	-0.148333	0.903903	1.00807	20.75	20.71	20.73	0.563333	1.46134	1.44963		21.2	21.67	21.435	0.483333	1.32906	1.31842		26	26.39	26.195	0.746667	1.52788	1.51564
	D5W	1301 (1)	20.08	20.14	20.11	0.301667	1.22852	20.66	20.62	20.64	-0.228333	0.855967	1.02546	20.7	20.84	20.77	0.523333	1.4225	1.1579	1.69389	21.56	21.66	21.61	0.308333	1.19898	1.16921	1.94359	28.77	28.66	28.715	-1.77333	0.365417	0.356344	37.7117
	D5W	1301 (2)	22.51	21.64	22.075	-1.66333	0.32149	22.03		22.03	-1.61833	0.33211	0.326757	21.81	21.85	21.83	-0.536667	0.696705	2.13218		22.56		22.56	-0.641667	0.685462	2.09777		22.18	21.09	21.635	5.30667	20.3398	62.2475
	D5W	1301 (3)	22.8		22.8	-2.38833	0.196045	21.5	21.75	21.625	-1.21333	0.437608	0.292901	23.38	23.37	23.375	-2.08167	0.246153	1.2556		22.38	22.43	22.405	-0.486667	0.750936	2.56379		21.81	22.58	22.195	4.74667	14.8006	50.5312
	Primer efficiency				97.83					97.61						96.09							80.14							76.42
	Converted primer efficiency				1.9783					1.9761						1.9609							1.8014							1.7642
	Average Ct (control)				20.4117					20.4117						21.2933							21.9183							26.9417
		Gene			TUB					UBQ							HRE2								PIN								LBD16								LBD18
		Sample			Ct	ΔCt	RQ			Ct	ΔCt	RQ	Geo Mean				Ct	ΔCt	RQ	Relative expression	Average				Ct	ΔCt	RQ	Relative expression	Average				Ct	ΔCt	RQ	Relative expression	Average				Ct	ΔCt	RQ	Relative expression	Average
	D1WW	1301 (1)	22.91	23.18	23.045	0.0333333	1.023	24.44	24.5	24.47	0.466667	1.37418	1.18566	30.37	30.94		30.655	-0.626667	0.647671	0.546254	1.15335	24.14	24.73		24.435	0.06	1.0339	0.872002	1.04932	31.55	31.95		31.75	-3.33	0.0848523	0.0715654	2.73752	31.37	31.78		31.575	-2.96667	0.132566	0.111808	2.16259
	D1WW	1301 (2)	22.53	22.53	22.53	0.548333	1.45367	24.59	24.88	24.735	0.201667	1.14724	1.2914	29.37	30.2		29.785	0.243333	1.18372	0.916621		24.7	24.14		24.42	0.075	1.04255	0.807303		26.9	26.82		26.86	1.56	3.17605	2.45939		27.04	27.27		27.155	1.45333	2.69097	2.08376
	D1WW	1301(3)	23.91	23.41	23.66	-0.581667	0.672445	25.68	25.53	25.605	-0.668333	0.634309	0.653099	29.65	29.64		29.645	0.383333	1.30435	1.99717		23.79	25.35		24.57	-0.075	0.959186	1.46867		26.62	26.68		26.65	1.77	3.71064	5.68159		27.17	27.02		27.095	1.51333	2.80322	4.29219
	D1W	1301 (1)	23.33	23.45	23.39	-0.311667	0.808455	24.75	24.32	24.535	0.401667	1.31467	1.03095	26.64	27.04		26.84	3.18833	9.11557	8.84195	4.38001	26.21	26.49		26.35	-1.855	0.356774	0.346065	0.167849	30.66	30.58		30.62	-2.2	0.195979	0.190096	0.080429	31.2	32.96		32.08	-3.47167	0.0939832	0.091162	0.0400213
	D1W	1301 (2)	22.23	21.8	22.015	1.06333	2.06565	22.21	22.25	22.23	2.70667	6.31911	3.61291	29.66	29.38		29.52	0.508333	1.42241	0.393701		25.49	25.64		25.565	-1.07	0.551838	0.152741		31.5	31.04		31.27	-2.85	0.121085	0.0335146		32.2			32.2	-3.59167	0.086607	0.0239716
	D1W	1301 (3)	22.82		22.82	0.258333	1.19273	21.36	21.08	21.22	3.71667	12.5725	3.87242	26.05	26.17		26.11	3.91833	15.1194	3.90439		32.36	31.02		31.69	-7.195	0.0183597	0.00474114		32.04			32.04	-3.62	0.0684485	0.0176759		35.94	32.9		34.42	-5.81167	0.0190923	0.00493031
	Primer efficiency				97.83					97.61							100								74.3								109.76								97.61
	Converted primer efficiency				1.9783					1.9761							2								1.743								2.0976								1.9761
	Average Ct (control)				23.0783					24.9367							30.0283								24.495								28.42								28.6083
		Gene			TUB					UBQ							HRE2								PIN								LBD16								LBD18
		Sample			Ct	ΔCt	RQ			Ct	ΔCt	RQ	Geo Mean				Ct	ΔCt	RQ	Relative expression	Average				Ct	ΔCt	RQ	Relative expression	Average				Ct	ΔCt	RQ	Relative expression	Average				Ct	ΔCt	RQ	Relative expression	Average
	D3WW	1301 (1)	23.83	23.33	23.58	-1.10167	0.471612	23.4	23.14	23.27	-0.94	0.527157	0.498611	33.11	35.41		33.11	-0.378333	0.769326	1.54294	1.27134	30.29	31		30.645	-1.65833	0.397968	0.798153	1.01387	34.05	32.02		33.035	-4.75667	0.0294898	0.0591439	2.96018	33.06	34.74		33.9	-4.285	0.0540081	0.108317	2.18456
	D3WW	1301 (2)	21.91	22.01	21.96	0.518333	1.42422	21.74	21.93	21.835	0.495	1.40096	1.41254	31.29	31.27		31.28	1.45167	2.73524	1.93639		28.34	28.22		28.28	0.706667	1.48087	1.04837		26.29	26.54		26.415	1.86333	3.97628	2.81498		28.01	27.96		27.985	1.63	3.03507	2.14866
	D3WW	1301(3)	21.91	21.88	21.895	0.583333	1.4888	21.84	21.93	21.885	0.445	1.35405	1.41983	36.34	31.27		33.805	-1.07333	0.47522	0.334702		27.99	28.08		28.035	0.951667	1.69682	1.19508		25.08	25.69		25.385	2.89333	8.52807	6.00641		26.89	27.03		26.96	2.655	6.1006	4.29672
	D3W	1301 (1)	22.77	22.47	22.62	-0.141667	0.907873	22.85	22.73	22.79	-0.46	0.731018	0.81466	25.18	24.97		25.075	7.65667	201.784	247.691	255.689	28.37	29.23		28.8	0.186667	1.10928	1.36165	0.962876	29.49	31.3		30.395	-2.11667	0.208459	0.255884	0.194612	31.31	31.1		31.205	-1.59	0.338582	0.415611	0.279978
	D3W	1301 (2)	22.4	22.4	22.4	0.0783333	1.0549	21.92	21.64	21.78	0.55	1.45444	1.23866	23.46	23.35		23.405	9.32667	642.106	518.387		27.9	28.23		28.065	0.921667	1.66877	1.34724		29.86	30.79		30.325	-2.04667	0.219554	0.177251		31.84			31.84	-2.225	0.219698	0.177367
	D1W	1301 (3)	20.46	20.52	20.49	1.98833	3.88264	22.15	21.76	21.955	0.375	1.29101	2.23887	31.63	31.54		31.585	1.14667	2.21402	0.988902		28.23	33.02		30.625	-1.63833	0.402415	0.179741		29.51	29.98		29.745	-1.46667	0.337396	0.1507		30.16	30.81		30.485	-0.87	0.5529	0.246955
	Primer efficiency				97.83					97.61							100								74.3								109.76								97.61
	Converted primer efficiency				1.9783					1.9761							2								1.743								2.0976								1.9761
	Average Ct (control)				22.4783					22.33							32.7317								28.9867								28.2783								29.615
		Gene			TUB					UBQ							HRE2								PIN								LBD16								LBD18
		Sample			Ct	ΔCt	RQ			Ct	ΔCt	RQ	Geo Mean				Ct	ΔCt	RQ	Relative expression	Average				Ct	ΔCt	RQ	Relative expression	Average				Ct	ΔCt	RQ	Relative expression	Average				Ct	ΔCt	RQ	Relative expression	Average
	D3WW	1301 (1)	21.91	22.11	22.01	0.556667	1.46196	20.83	20.91	20.87	1.42333	2.63654	1.96329	28.75	28.57		28.66	1.61667	3.06666	1.562	1.15245	27.42	27.5		27.46	0.608333	1.40213	0.714174	1.22597	27.23	26.93		27.08	0.68	1.6549	0.842919	1.13476	27	27.01		27.005	0.605	1.50996	0.769093	1.19209
	D3WW	1301 (2)	23.47	23.54	23.505	-0.938333	0.527205	24.01	23.27	23.64	-1.34667	0.399617	0.458999	31.9	33.27		32.585	-2.30833	0.201894	0.439856		30.51	30.33		30.42	-2.35167	0.270738	0.589844		29.08	29.89		29.485	-1.725	0.27863	0.607039		29.56	29.52		29.54	-1.93	0.268589	0.585163
	D3WW	1301(3)	22.25	22.12	22.185	0.381667	1.29743	22.4	22.34	22.37	-0.0766667	0.94912	1.10969	28.84	30.33		29.585	0.691667	1.61515	1.45549		26.18	26.47		26.325	1.74333	2.63428	2.37388		26.67	26.76		26.715	1.045	2.1687	1.95433		26.19	26.38		26.285	1.325	2.46574	2.222
	D3W	1301 (1)	24.57	24.2	24.385	-1.81833	0.289229	22.22	21.62	21.92	0.373333	1.28954	0.610715	25.96			25.96	4.31667	19.9272	32.6293	254.198	34.64	33.64		34.14	-6.07167	0.0342707	0.0561156	0.161414	34.98	34.94		34.96	-7.2	0.0048261	0.00790238	0.0718143	33.98	33.67		33.825	-6.215	0.014506	0.0237525	0.0566699
	D3W	1301 (2)	22.53	22.54	22.535	0.0316667	1.02184	22.72	22.26	22.49	-0.196667	0.87463	0.945373	25.07	25.57		25.32	4.95667	31.0531	32.8475		30.05	29.9		29.975	-1.90667	0.346678	0.36671		31.14	31.02		31.08	-3.32	0.0854832	0.0904227		30.98			30.98	-3.37	0.100722	0.106542
	D1W	1301 (3)	24.01	24.03	24.02	-1.45333	0.371013	21.45	21.4	21.425	0.868333	1.80659	0.8187	21.12			21.12	9.15667	570.731	697.118		33.45			33.45	-5.38167	0.0502826	0.0614176		30.9	30.95		30.925	-3.165	0.0958844	0.117118		33.79	31.49		32.64	-5.03	0.0325148	0.0397152
	Primer efficiency				97.83					97.61							100								74.3								109.76								97.61
	Converted primer efficiency				1.9783					1.9761							2								1.743								2.0976								1.9761
	Average Ct (control)				22.5667					22.2933							30.2767								28.0683								27.76								27.61

## Sheet: Line 1
		Gene			TUB					UBQ						RAP2.12								RAP2.2						ADH1							GOI
		Sample			Ct	ΔCt	RQ			Ct	ΔCt	RQ	Geo Mean			Ct	ΔCt	RQ	Relative expression	Average	Ct			ΔCt	RQ	Relative expression	Average			Ct	ΔCt	RQ	Relative expression	Average			Ct	ΔCt	RQ	Relative expression	Average
	D1WW	G1(1)	20.86	20.92	20.89	0.21	1.15404	21.83	20.86	21.345	-0.306667	0.811494	0.967728	23.09	22.46	22.46	-0.486667	0.720563	0.887946	1.17239	22.14	22.25	22.195	-0.318333	0.829146	0.856796	1.12102	27.13	27.15	27.14	-0.636667	0.696677	0.71991	1.11955	15.6	14.85	15.225	1.29667	2.62319	2.71066	1.30946
	D1WW	G1(2)	20.73	20.63	20.68	0.42	1.33181	20.09	19.79	19.94	1.09833	2.11299	1.67753	21.43	21.32	21.375	0.598333	1.49619	1.12342		22.14	21.49	21.815	0.0616667	1.03696	0.618149		24.46	24.44	24.45	2.05333	3.20808	1.91238		17.12	16.06	16.59	-0.0683333	0.950447	0.566576
	D1WW	G1(3)	21.73	21.73	21.73	-0.63	0.650633	21.83	21.83	21.83	-0.791667	0.583201	0.615995	22.15	22.02	22.085	-0.111667	0.927561	1.50579		21.48	21.76	21.62	0.256667	1.16307	1.88812		28.31	27.53	27.92	-1.41667	0.447429	0.726352		18.24	17.26	17.75	-1.22833	0.401091	0.651127
	D1W	G1(1)	20.89	20.97	20.93	0.17	1.12297	20.1	20.34	20.22	0.818333	1.7461	1.4003	22.2	22.21	22.205	-0.231667	0.855555	0.610981	0.610981	21	20.73	20.865	1.01167	1.81381	1.29531	1.29531	20.37	20.63	20.5	6.00333	30.2071	21.5719	21.5719	16.44	16.73	16.585	-0.0633333	0.953988	0.681276	0.291276
	D1W	G1(2)	20.58	20.77	20.675	0.425	1.33636	19.28	19.31	19.295	1.74333	3.27864	2.09319	22.15	22.72	22.435	-0.461667	0.732796	0.350086		20.57	20.55	20.56	1.31667	2.17047	1.03692		21.13	21.24	21.185	5.31833	20.475	9.78171		18.97	18.96	18.965	-2.44333	0.162477	0.0776218
	D1W	G1(3)	20.13	20.01	20.07	1.03	2.01921	19.89	20.71	20.3	0.738333	1.65351	1.82723	23.2	23.3	23.25	-1.27667	0.423284	0.231653		23.17	23.29	23.23	-1.35333	0.450894	0.246764		21.78	22.97	22.375	4.12833	10.4191	5.70215		18.58	18.66	18.62	-2.09833	0.210005	0.114931
	Primer efficiency				97.83					97.61						96.09							80.14							76.42							110.38
	Converted primer efficiency				1.9783					1.9761						1.9609							1.8014							1.7642							2.1038
	Average Ct (control)				21.1					21.0383						21.9733							21.8767							26.5033							16.5217
		Gene			TUB					UBQ						RAP2.12								RAP2.2						ADH1							GOI
		Sample			Ct	ΔCt	RQ			Ct	ΔCt	RQ	Geo Mean			Ct	ΔCt	RQ	Relative expression	Average	Ct			ΔCt	RQ	Relative expression	Average			Ct	ΔCt	RQ	Relative expression	Average			Ct	ΔCt	RQ	Relative expression	Average
	D3WW	G1(1)	21.94	21.97	21.955	-1.33	0.403582	20.96	21.02	20.99	-0.0883333	0.941608	0.616454	23.2	23.87	23.535	-2.1275	0.238672	0.591384	0.720566	25.81	25.73	25.77	-2.245	0.266781	0.661034	1.23422	29.17	29.56	29.365	-1.25	0.49183	1.21866	1.16665	19.43	19.56	19.495	-2.27667	0.183919	0.455717	1.83609
	D3WW	G1(2)	20.14	20.09	20.115	0.51	1.41615	20.79	20.91	20.85	0.0516667	1.03582	1.21115	21.64	21.34	21.49	-0.0825	0.945959	0.781045		22.55	22.53	22.54	0.985	1.78557	1.47428		27.93	27.91	27.92	0.195	1.11706	0.922318		16.33	16.17	16.25	0.968333	2.05483	1.6966
	D3WW	G1(3)	19.94	19.67	19.805	0.82	1.74968	20.88	20.85	20.865	0.0366667	1.02529	1.33938	21.25	21.4	21.325	0.0825	1.05713	0.789268		22.29	22.24	22.265	1.26	2.09927	1.56735		26.97	27.15	27.06	1.055	1.82015	1.35895		15.84	15.98	15.91	1.30833	2.64605	1.97558
	D3W	G1(1)	21.55	21.5	21.525	-0.9	0.541174	22.47	22.89	22.68	-1.77833	0.29782	0.401463	21.59	21.91	21.75	-0.3425	0.794025	2.66613	1.76091	23.1	23.17	23.135	0.39	1.25802	3.13359	3.42026	20.96	20.66	20.81	7.305	63.2458	157.539	167.215	16.6	16.49	16.545	0.673333	1.65002	4.11003	3.30186
	D3W	G1(2)	21.64	21.73	21.685	-1.06	0.485211	23.16	23.16	23.16	-2.25833	0.214766	0.32281	22.95	22.35	22.65	-1.2425	0.433136	2.01678		23.47	22.97	23.22	0.305	1.19663	3.70692		20.98	21	20.99	7.125	57.1022	176.891		17.67	17.35	17.51	-0.291667	0.80499	2.49369
	D3W	G1(3)	20.86	20.92	20.89	-0.265	0.834608	19.28	19.31	19.295	1.60667	2.98721	1.57897	22.15	22.72	22.435	-1.0275	0.500613	0.599818		20.59	20.55	20.57	2.955	5.69283	3.6054		21.13	21.24	21.185	6.93	51.1183	61.2483		15.6	14.85	15.225	1.99333	4.40408	2.78921
	Primer efficiency				97.83					97.61						96.09					80.14		80.14							76.42							110.38
	Converted primer efficiency				1.9783					1.9761						1.9609					1.8014		1.8014							1.7642							2.1038
	Average Ct (control)				20.625					20.9017						21.4075					23.55		23.525							28.115							17.2183
		Gene			TUB					UBQ						RAP2.12								RAP2.2						ADH1							GOI
		Sample			Ct	ΔCt	RQ			Ct	ΔCt	RQ	Geo Mean			Ct	ΔCt	RQ	Relative expression	Average	Ct			ΔCt	RQ	Relative expression	Average			Ct	ΔCt	RQ	Relative expression	Average			Ct	ΔCt	RQ	Relative expression	Average
	D5WW	G1(1)	18.62	18.65	18.635	2.585	5.83331	21.01		21.01	0.77	1.68956	3.13938	21.27	20.8	21.035	1.20167	2.24613	0.715468	1.11192	21.8	21.8	21.8	1.97333	3.19451	1.01756	0.772518	27.84	27.93	27.885	2.00167	3.11535	0.992345	1.10261	16.44	16.98	16.71	0.265	1.21786	0.720814	1.44258
	D5WW	G1(2)	22.68	22.83	22.755	-1.535	0.350907	23.64	23.08	23.36	-1.58	0.340896	0.345865	22.9	22.86	22.88	-0.643333	0.648416	1.87477		24.66	24.38	24.52	-0.746667	0.644384	1.86311		30.98	30.97	30.975	-1.08833	0.539106	1.55872		17.13	17.08	17.105	-0.13	0.90784	2.62484
	D5WW	G1(3)	22.29	22.25	22.27	-1.05	0.488532	21.16	20.78	20.97	0.81	1.73622	0.920978	22.65	22.94	22.795	-0.558333	0.686614	0.745527		25	23.47	25	-1.22667	0.485793	0.527476		30.72	30.88	30.8	-0.913333	0.595415	0.646503		17.17	17.05	17.11	-0.135	0.90447	0.982076
	D5W	G1(1)	21.61	21.48	21.545	-0.325	0.801134	19.53	19.92	19.725	2.055	4.05403	1.80217	22.74	22.95	22.845	-0.608333	0.66388	0.828676	1.24888	22.61	22.47	22.54	1.23333	2.06658	1.14672	1.80112	22.96	23.49	23.225	6.66167	43.8954	54.7916	137.97	16.73	16.44	16.585	0.39	1.33651	1.66827	1.78409
	D5W	G1(2)	21.91	21.91	21.91	-0.69	0.624537	19.53	19.53	19.53	2.25	4.62988	1.70045	22.08	22.27	22.175	0.0616667	1.0424	1.66908		21.21	21.48	21.345	2.42833	4.17548	2.45551		20.48	20.44	20.46	9.42667	210.923	337.727		16.75	16.74	16.745	0.23	1.18656	1.89991
	D5W	G1(3)	19.21	19.6	19.405	1.815	3.44961	18.74	18.95	18.845	2.935	7.38243	5.04644	22.28	22.8	22.54	-0.303333	0.815246	0.161549		21.58	21.67	21.625	2.14833	3.54108	0.701699		21.52	21.76	21.64	8.24667	107.944	21.3901		18.93	19.04	18.985	-2.01	0.224265	0.0444402
	Primer efficiency				97.83					97.61						96.09					80.14		80.14							76.42							110.38
	Converted primer efficiency				1.9783					1.9761						1.9609					1.8014		1.8014							1.7642							2.1038
	Average Ct (control)				21.22					21.78						22.2367					23.82		23.7733							29.8867							16.975
		Gene			TUB					UBQ							HRE2								PIN								LBD16								LBD18
		Sample			Ct	ΔCt	RQ			Ct	ΔCt	RQ	Geo Mean				Ct	ΔCt	RQ	Relative expression	Average				Ct	ΔCt	RQ	Relative expression	Average				Ct	ΔCt	RQ	Relative expression	Average				Ct	ΔCt	RQ	Relative expression	Average
	D1WW	G1 (1)	22.55	22.9	22.725	0.0666667	1.04653	23.99	24.22	24.105	-0.511667	0.70574	0.859406	30.71	31.32		31.015	-0.271667	0.828362	0.963877	1.01737	26.8	27.09		26.945	0.4	1.24887	1.45318	1.05746	28.44	28.69		28.565	-0.785	0.559046	0.650503	1.04403	27.91	27.52		27.715	-0.378333	0.772833	0.899264	1.00469
	D1WW	G1 (2)	22.43	22.5	22.465	0.326667	1.24965	23.13	23.33	23.23	0.363333	1.28079	1.26512	30.82	30.58		30.7	0.0433333	1.03049	0.814539		26.64	26.91		26.775	0.57	1.37259	1.08494		27.12	27.09		27.12	0.66	1.63056	1.28885		26.85	26.76		26.805	0.531667	1.43639	1.13537
	D1WW	G1(3)	23.25	23.12	23.185	-0.393333	0.764642	23.4	23.49	23.445	0.148333	1.10631	0.919747	30.45	30.58		30.515	0.228333	1.17148	1.2737		27.82	28.81		28.315	-0.97	0.583367	0.634269		27.5	27.81		27.655	0.125	1.09702	1.19274		27.47	27.49		27.49	-0.153333	0.90083	0.979432
	D1W	G1 (1)	21.87	21.64	21.755	1.03667	2.02841	22.9	22.62	22.76	0.833333	1.76404	1.89161	26.48	26.89		26.685	4.05833	16.6602	8.80741	4.64119	28.3	28.65		28.475	-1.13	0.533745	0.282164	0.200616	30.91	30.84		30.91	-3.13	0.0984029	0.0520207	0.116955	30.95	30.32		30.635	-3.29833	0.105761	0.0559103	0.0543717
	D1W	G1 (2)	21.83	21.82	21.825	0.966667	1.93382	21.84	21.6	21.72	1.87333	3.58219	2.63198	27.87	27.26		27.565	3.17833	9.05261	3.43947		28.18	27.63		27.905	-0.56	0.732611	0.27835		28.87	28.14		28.14	-0.36	0.765914	0.291003		29.32			29.32	-1.98333	0.259007	0.0984079
	D1W	G1 (3)	21.49	21.63	21.56	1.23167	2.31704	21.75	21.38	21.565	2.02833	3.98106	3.03715	28.38	28.41		28.395	2.34833	5.09236	1.67669		30.12	32.04		31.08	-3.735	0.125532	0.0413322		32.8	32.85		32.825	-5.045	0.0238182	0.00784229		32.49	32.82		32.655	-5.31833	0.0267171	0.00879677
	Primer efficiency				97.83					97.61							100								74.3								109.76								97.61
	Converted primer efficiency				1.9783					1.9761							2								1.743								2.0976								1.9761
	Average Ct (control)				22.7917					23.5933							30.7433								27.345								27.78								27.3367
		Gene			TUB					UBQ							HRE2								PIN								LBD16								LBD18
		Sample			Ct	ΔCt	RQ			Ct	ΔCt	RQ	Geo Mean				Ct	ΔCt	RQ	Relative expression	Average				Ct	ΔCt	RQ	Relative expression	Average				Ct	ΔCt	RQ	Relative expression	Average				Ct	ΔCt	RQ	Relative expression	Average
	D3WW	G1 (1)	21.96	22.31	22.135	-0.07	0.953366	23.12	23.25	23.185	0.0333333	1.02296	0.987552	32.07	31.99		32.03	0.82	1.76541	1.78766	1.15482	23.38			23.38	1.61833	2.45753	2.48851	1.30448	29	29.05		29.025	2.63	7.01666	7.10511	2.62661	27.8	27.88		27.84	1.51333	2.80322	2.83856	1.3488
	D3WW	G1 (2)	22.99	22.99	22.99	-0.925	0.532022	23.1	23.39	23.245	-0.0266667	0.982001	0.722804	33.49	35.39		34.44	-1.59	0.332171	0.459559		27.08	27.5		27.29	-2.29167	0.279915	0.387263		33.76	32.28		33.76	-2.105	0.210268	0.290906		30.19	31.55		30.87	-1.51667	0.355923	0.49242
	D3WW	G1(3)	21.18	20.96	21.07	0.995	1.97156	23.06	23.39	23.225	-0.00666667	0.995469	1.40094	32.08			32.08	0.77	1.70527	1.21723		24.09	24.56		24.325	0.673333	1.4537	1.03766		32.4	31.96		32.18	-0.525	0.677791	0.483812		29.34	29.35		29.35	0.00333333	1.00227	0.715429
	D3W	G1 (1)	22.45	22.19	22.32	-0.255	0.840322	23.48	25.2	24.34	-1.12167	0.465802	0.625638	25.85	25.38		25.615	7.235	150.644	240.785	159.165	25.33	24.56		24.945	0.0533333	1.03008	1.64644	#DIV/0!	34.16	34.23		34.16	-2.505	0.156345	0.249897	1.39311	28.51	29.8		29.155	0.198333	1.14464	1.82956	#DIV/0!
	D3W	G1 (2)	22.8	22.19	22.495	-0.43	0.745752	23.59	24.37	23.98	-0.761667	0.59524	0.666259	25.43	25.91		25.67	7.18	145.009	217.647		24.03	25.33		24.68	0.318333	1.19347	1.79131		31.84	31.75		31.75	-0.095	0.932044	1.39892		28.87	29.13		29	0.353333	1.27209	1.90931
	D1W	G1 (3)	30.73	30.8	30.765	-8.7	0.00264398	27.89	27.67	27.78	-4.56167	0.044732	0.0108752	34.66	35.58		35.12	-2.27	0.20733	19.0644					#DIV/0!	#DIV/0!	#DIV/0!	#DIV/0!		36.4	36.61		36.505	-4.85	0.0275198	2.5305					#DIV/0!	#DIV/0!	#DIV/0!	#DIV/0!
	Primer efficiency				97.83					97.61							100								74.3								109.76								97.61
	Converted primer efficiency				1.9783					1.9761							2								1.743								2.0976								1.9761
	Average Ct (control)				22.065					23.2183							32.85								24.9983								31.655								29.3533
		Gene			TUB					UBQ							HRE2								PIN								LBD16								LBD18
		Sample			Ct	ΔCt	RQ			Ct	ΔCt	RQ	Geo Mean				Ct	ΔCt	RQ	Relative expression	Average				Ct	ΔCt	RQ	Relative expression	Average				Ct	ΔCt	RQ	Relative expression	Average				Ct	ΔCt	RQ	Relative expression	Average
	D5WW	G1 (1)	23.57	23.68	23.625	-0.766667	0.592711	25.27	25.32	25.295	-0.746667	0.601353	0.597016	31.3	33.23		32.265	-0.563333	0.676737	1.13353	1.04607	28.95	28.67		28.81	-0.035	0.980742	1.64274	1.07399	32.42	33.83		33.125	0.161667	1.12723	1.8881	1.17884	31.41	30.98		31.195	-0.358333	0.783433	1.31225	1.03723
	D5WW	G1 (2)	22.81	22.55	22.68	0.178333	1.12938	24.49	24.45	24.47	0.0783333	1.0548	1.09145	30.58	31.7		31.14	0.561667	1.47597	1.3523		28.73	28.84		28.785	-0.01	0.994459	0.911133		32.91	33.73		32.91	0.376667	1.32185	1.21109		30.25	30.84		30.545	0.291667	1.21977	1.11756
	D5WW	G1(3)	22.29	22.25	22.27	0.588333	1.49389	24.37	23.39	23.88	0.668333	1.57652	1.53465	31.7	31.7		31.7	0.00166667	1.00116	0.652368		28.73	28.73		28.73	0.045	1.02532	0.668113		33.73	33.92		33.825	-0.538333	0.671129	0.437318		30.5	30.77		30.77	0.0666667	1.04646	0.681886
	D5W	G1 (1)	21.81	21.98	21.895	0.963333	1.92943	22.91	23.01	22.96	1.58833	2.95014	2.38581	23.18			23.18	8.52167	367.517	154.043	73.0216	25.47	26.49		25.98	2.795	4.72527	1.98057	0.932927	26.95	27.04		26.95	6.33667	109.307	45.8156	15.588	25.29	24.97		25.13	5.70667	48.7622	20.4384	6.96895
	D5W	G1 (2)	21.85	21.26	21.555	1.30333	2.43314	19.53	19.53	19.53	5.01833	30.5118	8.61624	22.86	23.18		23.02	8.68167	410.622	47.6568		25.62	26.51		26.065	2.71	4.50729	0.523116		31.06	31.01		31.01	2.27667	5.40077	0.626813		29.29			29.29	1.54667	2.86759	0.332813
	D5W	G1 (3)	21.19	21.08	21.135	1.72333	3.24049	19.85	19.74	19.795	4.75333	25.4729	9.0854	24.4			24.4	7.30167	157.769	17.3651		27	27		27	1.775	2.68104	0.295093		31.84			31.84	1.44667	2.92029	0.321426		30.1	30.96		30.53	0.306667	1.2323	0.135635
	Primer efficiency				97.83					97.61							100								74.3								109.76								97.61
	Converted primer efficiency				1.9783					1.9761							2								1.743								2.0976								1.9761
	Average Ct (control)				22.8583					24.5483							31.7017								28.775								33.2867								30.8367

## Sheet: Line 5
		Gene			TUB					UBQ						RAP2.12								RAP2.2						ADH1							GOI
		Sample			Ct	ΔCt	RQ			Ct	ΔCt	RQ	Geo Mean			Ct	ΔCt	RQ	Relative expression	Average			Ct	ΔCt	RQ	Relative expression	Average			Ct	ΔCt	RQ	Relative expression	Average			Ct	ΔCt	RQ	Relative expression	Average
	D1WW	G5 (1)	21.68		21.68	-1.14833	0.456833	20.86	20.86	20.86	0.00333333	1.00227	0.676662	21.95	21.86	21.905	-0.47	0.728695	1.0769	1.0134	21.54	22.02	21.78	0.055	1.0329	1.52646	1.41388	26.5	28.54	27.52	-0.545	0.733891	1.08457	1.01096	19.77	19.84	19.805	-2.05833	0.216346	0.319725	1.45094
	D1WW	G5 (2)	20.85	20.41	20.63	-0.0983333	0.935114	20.02	20.02	20.02	0.843333	1.77609	1.28874	21.3	21.5	21.4	0.035	1.02385	0.794458		21.89	20.96	21.425	0.41	1.27292	1.36124		26.73	25.87	26.3	0.675	1.46697	1.13829		16.11	15.76	15.935	1.81167	3.84748	2.98546
	D1WW	G5 (3)	19.62	18.95	19.285	1.24667	2.34087	21.71	21.71	21.71	-0.846667	0.561757	1.14673	21.02	20.98	21	0.435	1.34035	1.16884		22.3		22.3	-0.465	0.760574	1.35392		27.34	26.87	27.105	-0.13	0.928857	0.810001		17.52	17.48	17.5	0.246667	1.20136	1.04764
	D1W	G5 (1)	23.22	23.85	23.535	-3.00333	0.128865	22.24	22.24	22.24	-1.37667	0.391534	0.224622	24.45	24.32	24.385	-2.95	0.137169	0.610666	0.426201	23.53	25.66	24.595	-2.76	0.197023	1.5289	0.894113	26.84	27.36	27.1	-0.125	0.931497	4.14695	4.58404	19.92	19.96	19.94	-2.19333	0.195679	0.871146	0.557508
	D1W	G5 (2)	21.18	21.07	21.125	-0.593333	0.667114	21.08	22.05	21.565	-0.701667	0.62007	0.643162	23.33	23.12	23.225	-1.79	0.299574	0.465784		22.85	23.16	23.005	-1.17	0.502269	0.780937		24.4	25.42	24.91	2.065	3.2294	5.02112		20.55	20.79	20.67	-2.92333	0.113697	0.176779
	D1W	G5 (3)	20.26	20.43	20.345	0.186667	1.13582	19.53	19.45	19.49	1.37333	2.54826	1.70128	22.84	23.2	23.02	-1.585	0.343921	0.202154		22.42	22.8	22.61	-0.775	0.633727	0.3725		26.87	26.79	26.83	0.145	1.0858	0.638224		17.84	17.49	17.665	0.0816667	1.06262	0.624601
	Primer efficiency				97.83					97.61						96.09							80.14							76.42							110.38
	Converted primer efficiency				1.9783					1.9761						1.9609							1.8014							1.7642							2.1038
	Average Ct (control)				20.5317					20.8633						21.435							21.835							26.975							17.7467
		Gene			TUB					UBQ						RAP2.12								RAP2.2						ADH1							GOI
		Sample			Ct	ΔCt	RQ			Ct	ΔCt	RQ	Geo Mean			Ct	ΔCt	RQ	Relative expression	Average			Ct	ΔCt	RQ	Relative expression	Average			Ct	ΔCt	RQ	Relative expression	Average			Ct	ΔCt	RQ	Relative expression	Average
	D3WW	G5 (1)	18.69	18.51	18.6	-0.226667	0.856723	20.88	20.8	20.84	0.1	1.07049	0.957659	22.19	22.28	22.235	-0.528333	0.700626	0.731603	1.49192	23.1	23.09	23.095	-0.828333	0.614143	0.641297	1.93456	29.13	29.17	29.15	-0.973333	0.575475	0.600919	81.63	17.91	17.75	17.83	-0.45	0.715563	0.747201	0.952181
	D3WW	G5 (2)	18.01	17.76	17.885	0.488333	1.39537	20.9	20.85	20.875	0.065	1.04527	1.2077	21.96	21.74	21.85	-0.143333	0.907991	0.751836		21.86	21.93	21.895	0.371667	1.24452	1.03049		27.61	27.38	27.495	0.681667	1.47253	1.21928		16.92	16.94	16.93	0.45	1.3975	1.15716
	D3WW	G5(1)	18.62	18.65	18.635	-0.261667	0.836508	21.71	20.5	21.105	-0.165	0.8937	0.864631	21.27	20.8	21.035	0.671667	1.57193	1.81803		21.81		21.81	0.456667	1.30836	1.5132		27.84	27.93	27.885	0.291667	1.18008	1.36483		16.44	16.98	16.71	0.67	1.64594	1.90363
	D3W	G5 (1)	23.39		23.39	-5.01667	0.0326288	20.34		20.34	0.6	1.50482	0.221586	22.52	22.9	22.71	-1.00333	0.508826	2.29629	2.09163	23.27	22.91	23.09	-0.823333	0.615953	2.77974	2.40201	20.72	20.75	20.735	7.44167	68.3481	308.449	224.55	17.19	17.02	17.105	0.275	1.22695	5.53711	3.91826
	D3W	G5 (2)	18.13	18.87	18.5	-0.126667	0.917212	20.65	25.11	25.11	-4.17	0.0584086	0.231459	22.78	22.59	22.685	-0.978333	0.517465	2.23567		22.53	22.64	22.585	-0.318333	0.829146	3.58226		23.07	23.27	23.17	5.00667	17.1547	74.1156		18.82	19.04	18.93	-1.55	0.31575	1.36417
	D1W	G5 (3)	21.04	20.69	20.865	-2.49167	0.1827	20.92	20.64	20.78	0.16	1.11514	0.451371	21.88	22.01	21.945	-0.238333	0.851722	1.88697		22.81	22.03	22.42	-0.153333	0.913706	2.02429		21.04	20.69	20.865	7.31167	63.4856	140.651		16.74	17.92	17.33	0.05	1.03789	2.29941
	Primer efficiency				97.83					97.61						96.09							80.14							76.42							110.38
	Converted primer efficiency				1.9783					1.9761						1.9609							1.8014							1.7642							2.1038
	Average Ct (control)				18.3733					20.94						21.7067							22.2667							28.1767							17.38
		Gene			TUB					UBQ						RAP2.12								RAP2.2						ADH1							GOI
		Sample			Ct	ΔCt	RQ			Ct	ΔCt	RQ	Geo Mean			Ct	ΔCt	RQ	Relative expression	Average			Ct	ΔCt	RQ	Relative expression	Average			Ct	ΔCt	RQ	Relative expression	Average			Ct	ΔCt	RQ	Relative expression	Average
	D5WW	G5 (1)	19.3	19.4	19.35	0.39	1.30483	20.35	19.85	20.1	-0.253333	0.841515	1.04787	20.68	21.72	21.72	0.263333	1.19402	1.13948	1.02568	22.72	22.94	22.83	0.423333	1.28295	1.22434	1.07779	29.18	28.7	28.94	-0.491667	0.756451	0.721893	1.06167	15.88	15.83	15.855	1.18333	2.41114	2.30099	1.69242
	D5WW	G5 (2)	19.99	19.89	19.94	-0.2	0.872452	19.49	19.75	19.62	0.226667	1.16694	1.00901	21.41	21.95	21.68	0.303333	1.22662	1.21567		22.49	22.74	22.615	0.638333	1.45601	1.44301		28.75	28.61	28.68	-0.231667	0.876765	0.868935		18.23	18.28	18.255	-1.21667	0.404586	0.400973
	D5WW	G5 (3)	20.06	19.8	19.93	-0.19	0.878425	19.75	19.89	19.82	0.0266667	1.01833	0.945794	23.46	22.55	22.55	-0.566667	0.682771	0.721903		24.29	24.34	24.315	-1.06167	0.535337	0.566019		27.76	27.69	27.725	0.723333	1.50777	1.59419		17.15	16.86	17.005	0.0333333	1.0251	1.08385
	D5W	G5 (1)	19.52	19.45	19.485	0.255	1.19002	19.79	19.92	19.855	-0.00833333	0.99434	1.08779	22.41	23.79	23.1	-1.11667	0.471438	0.433391	1.70187	22.22	22.39	22.305	0.948333	1.74745	1.60642	2.80335	20.24	20.9	20.57	7.87833	87.5762	80.5084	149.991	16.61	16.29	16.45	0.588333	1.54894	1.42393	1.20408
	D5W	G5 (2)	21.61	20.76	21.185	-1.445	0.373128	21.81	21.81	21.81	-1.96333	0.26256	0.312999	22.95	23.16	23.055	-1.07167	0.485943	1.55254		23.22	23.27	23.245	0.00833333	1.00492	3.21061		22.34	21.41	21.875	6.57333	41.7485	133.382		20.79	20.79	20.79	-3.75167	0.0614038	0.196179
	D5W	G5 (3)	21.01		21.01	-1.27	0.420445	22.67	20.74	22.67	-2.82333	0.146161	0.247897	22.19	22.54	22.365	-0.381667	0.773356	3.11967		23.18	23.72	23.45	-0.196667	0.890697	3.59302		20.67	21.89	21.28	7.16833	58.5244	236.084		18.8	19.07	18.935	-1.89667	0.243988	0.984232
	Primer efficiency				97.83					97.61						96.09							80.14							76.42							110.38
	Converted primer efficiency				1.9783					1.9761						1.9609							1.8014							1.7642							2.1038
	Average Ct (control)				19.74					19.8467						21.9833							23.2533							28.4483							17.0383
		Gene			TUB					UBQ							HRE2								PIN								LBD16								LBD18
		Sample			Ct	ΔCt	RQ			Ct	ΔCt	RQ	Geo Mean				Ct	ΔCt	RQ	Relative expression	Average				Ct	ΔCt	RQ	Relative expression	Average				Ct	ΔCt	RQ	Relative expression	Average				Ct	ΔCt	RQ	Relative expression	Average
	D1WW	G5 (1)	19.13	19.05	19.09	-0.316667	0.805701	21.48	21.33	21.405	0.223333	1.1643	0.968543	29.38	31.02		30.2	0.0766667	1.05458	1.08883	1.00213	29.84	29.74		29.79	-0.315	0.839443	0.866707	1.00651	27.48	29.3		28.39	1.06333	2.19836	2.26976	1.1991	30.49	30.87		30.68	0.566667	1.47104	1.51882	1.05447
	D1WW	G5 (2)	18.11	18.74	18.425	0.348333	1.26826	21.71	21.79	21.75	-0.121667	0.920471	1.08046	30.47	30.07		30.27	0.00666667	1.00463	0.929817		29.28	29.09		29.09	0.385	1.23851	1.14628		29.88	29.91		29.895	-0.441667	0.720951	0.667262		31.76	31.6		31.68	-0.433333	0.744417	0.688981
	D1WW	G5(3)	19.31	18.3	18.805	-0.0316667	0.978627	21.84	21.62	21.73	-0.101667	0.933095	0.95559	29.19	31.53		30.36	-0.0833333	0.943874	0.987739		29.31	29.78		29.545	-0.07	0.961854	1.00655		30.38	29.77		30.075	-0.621667	0.630951	0.660274		31.75	31.38		31.38	-0.133333	0.913185	0.955624
	D1W	G5 (1)	23.22	23.85	23.535	-4.76167	0.0388289	23.97	23.9	23.935	-2.30667	0.20781	0.0898279	35.91	35.75		35.83	-5.55333	0.0212951	0.237066	2.04713	31.1	31.01		31.055	-1.58	0.415671	4.62742	4.37735	31.73	33.79		32.76	-3.30667	0.0863317	0.961079	0.401195	33.44	33.37		33.405	-2.15833	0.229904	2.55938	3.13267
	D1W	G5 (2)	21.5	21.6	21.55	-2.77667	0.150416	23.14	23.14	23.14	-1.51167	0.357138	0.231774	30.02	30.2		30.11	0.166667	1.12246	4.84291		28.96	28.41		28.685	0.79	1.55105	6.69205		30.74	33.89		33.89	-4.43667	0.0373787	0.161272		31.28	31.28		31.28	-0.0333333	0.977552	4.21769
	D1W	G5 (3)	20.26	20.43	20.345	-1.57167	0.342237	21.05	21.05	21.05	0.578333	1.48278	0.712364	30.78	30.58		30.68	-0.403333	0.756109	1.06141		28.99	29.04		29.015	0.46	1.29121	1.81257		33.3			33.3	-3.84667	0.0578682	0.0812341		30.33	30.33		30.33	0.916667	1.86706	2.62094
	Primer efficiency				97.83					97.61							100								74.3								109.76								97.61
	Converted primer efficiency				1.9783					1.9761							2								1.743								2.0976								1.9761
	Average Ct (control)				18.7733					21.6283							30.2767								29.475								29.4533								31.2467
		Gene			TUB					UBQ							HRE2								PIN								LBD16								LBD18
		Sample			Ct	ΔCt	RQ			Ct	ΔCt	RQ	Geo Mean				Ct	ΔCt	RQ	Relative expression	Average				Ct	ΔCt	RQ	Relative expression	Average				Ct	ΔCt	RQ	Relative expression	Average				Ct	ΔCt	RQ	Relative expression	Average
	D3WW	G5 (1)	18.69	18.51	18.6	1.22667	2.30915	20.88	20.8	20.84	1.40333	2.60087	2.45067	30.78	31.68	32.94	31.23	1.17889	2.26402	0.923838	1.86826	26.02	26.85		26.435	0.401111	1.24965	0.50992	1.50697	29.16	29.17	28.95	29.0933	0.991667	2.08469	0.850661	1.95522	26.95	26.36		26.655	1.36222	2.52905	1.03198	2.50028
	D3WW	G5 (2)	19.92	20.35	20.135	-0.308333	0.810295	22.93	22.76	22.845	-0.601667	0.663776	0.733386	30.27	30.37	31.48	30.7067	1.70222	3.25402	4.43698		23.65	25.21	25.13	25.17	1.66611	2.52364	3.44109		28.43	27.7	28.36	28.395	1.69	3.49713	4.76847		25.69	25.99	25.62	25.7667	2.25056	4.63164	6.31542
	D3WW	G5(3)	20	21.49	20.745	-0.918333	0.534447	23.11	22.98	23.045	-0.801667	0.579242	0.556394	34.97	35.61		35.29	-2.88111	0.135737	0.243959		27.86	29.45	29.4	28.9033	-2.06722	0.317092	0.569905		32.89	32.16	33.25	32.7667	-2.68167	0.137166	0.246527		33.55	31.9	31.36	31.63	-3.61278	0.0853706	0.153435
	D3W	G5 (1)	21.13	21.34	21.235	-1.40833	0.38258	22.08	21.66	21.87	0.373333	1.28954	0.70239	26.02	25.89	26.66	26.19	6.21889	74.4856	106.046	68.9385	26.55	26.63	27.55	26.91	-0.0738889	0.959778	1.36645	2.12142	31.49	32.17	31.79	31.64	-1.555	0.316025	0.449928	0.48062	29.75	29.6	29.88	29.7433	-1.72611	0.308604	0.439362	0.432961
	D3W	G5 (2)	21.68	21.29	21.485	-1.65833	0.322588	22.27	21.49	21.49	0.753333	1.67049	0.734084	26.28	26.46	26.17	26.3033	6.10556	68.8582	93.8015		24.97	25.31	26.57	25.6167	1.21944	1.96901	2.68227		32.64	31.8	31.4	31.6	-1.515	0.325529	0.44345		28.83	28.76	28.83	28.8067	-0.789444	0.584084	0.795664
	D1W	G5 (3)	20	20.53	20.265	-0.438333	0.741524	21.64	21.61	21.625	0.618333	1.52373	1.06296	29.06	29.52	29.98	29.52	2.88889	7.407	6.96828		25.57	24.86		25.215	1.62111	2.46133	2.31554		29.9	30.73	31.81	30.8133	-0.728333	0.583014	0.548481		34.28	30.81	30.81	31.9667	-3.94944	0.0678764	0.0638561
	Primer efficiency				97.83					97.61							100								74.3								109.76								97.61
	Converted primer efficiency				1.9783					1.9761							2								1.743								2.0976								1.9761
	Average Ct (control)				19.8267					22.2433							32.4089								26.8361								30.085								28.0172
		Gene			TUB					UBQ							HRE2								PIN								LBD16								LBD18
		Sample			Ct	ΔCt	RQ			Ct	ΔCt	RQ	Geo Mean				Ct	ΔCt	RQ	Relative expression	Average				Ct	ΔCt	RQ	Relative expression	Average				Ct	ΔCt	RQ	Relative expression	Average				Ct	ΔCt	RQ	Relative expression	Average
	D3WW	G5 (1)	22.14	22.27	22.205	0.47	1.37803	20.47		20.47	0.47	1.37731	1.37767	30.44	31.05		30.745	0.275	1.20999	0.878293	1.00826	28.73	28.66		28.695	0.89	1.63966	1.19018	1.02139	30.73	30.88		30.805	-0.235	0.840224	0.60989	1.66459	30.73	30.88		30.805	-0.198333	0.873637	0.634143	1.5078
	D3WW	G5 (2)	22.9	22.92	22.91	-0.235	0.851866	20.39	21.85	21.12	-0.18	0.884615	0.868086	30.61	31.34		30.975	0.045	1.03168	1.18846		30.2	30.55		30.375	-0.79	0.644726	0.742698		32	31.91		31.955	-1.385	0.358438	0.412906		32	31.91		31.955	-1.34833	0.399164	0.45982
	D3WW	G5(3)	22.92	22.9	22.91	-0.235	0.851866	21.69	20.77	21.23	-0.29	0.820759	0.836168		31.34		31.34	-0.32	0.80107	0.958025		29.59	29.78		29.685	-0.1	0.945955	1.1313		28.84	29.06		28.95	1.62	3.3204	3.97098		28.84	29.06		29.06	1.54667	2.86759	3.42945
	D3W	G5 (1)	22.41	22.31	22.36	0.315	1.23974	20.45	20.98	20.715	0.225	1.16562	1.20211	28.86			28.86	2.16	4.46915	3.71775	80.8718	28.87	29.11		28.99	0.595	1.39178	1.15778	0.672837	32.45	31.74		32.095	-1.525	0.323127	0.268799	0.361075	32.45	31.74		32.095	-1.48833	0.362859	0.301851	0.394608
	D3W	G5 (2)	23.16	22.86	23.01	-0.335	0.795687	20.95	20.81	20.81	0.13	1.09258	0.932392	25.98	24.9		25.44	5.58	47.8352	51.3037		30.98	30.57		30.775	-1.19	0.516245	0.553678		32.86			32.86	-2.29	0.183339	0.196633		32.86			32.86	-2.25333	0.215498	0.231124
	D1W	G5 (3)	22.95	23.11	23.03	-0.355	0.784904	19.88	20.44	20.16	0.78	1.7011	1.15551	22.79	23.73		23.26	7.76	216.767	187.594		30.96	31.94		31.45	-1.865	0.354797	0.307048		31.12	30.93		31.025	-0.455	0.713865	0.617792		31.12	30.93		31.025	-0.418333	0.752061	0.650848
	Primer efficiency				97.83					97.61							100								74.3								109.76								97.61
	Converted primer efficiency				1.9783					1.9761							2								1.743								2.0976								1.9761
	Average Ct (control)				22.675					20.94							31.02								29.585								30.57								30.6067

## Sheet: Compiled
	Figure 6. Gene expression of Arabidopsis plants for 1, 3, and 5 days of waterlogging.
	(A) AtRAP2.12, (B) AtRAP2.2, (C) AtHRE2, (D) AtADH1, (E) AtPIN1, (F) AtLBD16, and (G) AtLBD18. Error bars indicate standard error between three biological replicates. Asterisks (*) indicate a significant difference between well-watered and waterlogged samples at p < 0.05. Different capital letters indicate a significant difference between time points within well-watered samples, while different l…
	Wild type											Wild type
		RAP2.12		RAP2.2		ADH1							HRE2		PIN1		LBD16		LBD18
		WW	W	WW	W	WW	W						WW	W	WW	W	WW	W	WW	W
	Day 1	0.183078		0.168072		0.888354						Day 1	1.34647		0.0473784	-0.719796	-1.35134	3.27727	-0.993652	2.1012
	Day 1	0.014144	-3.14271	0.117288	-2.23573		3.3263					Day 1	0.504773	4.15701	0.346014	0.482955	-0.801533	3.30838	-0.307198	1.76944
	Day 1	-0.197222	-1.50736	-0.302342	-1.37998	-1.11461	4.19891					Day 1	-1.85124	4.4534	-0.393392		2.15287		1.30085
	Day 3		-0.0894963		0.3108	-0.515267	5.08414					Day 3	0.211756	6.59535	-0.119433	0.257871	-0.20536	-2.57206	1.153	-0.556992
	Day 3	-0.63213	0.34718	-0.337589		-0.63588	6.86874					Day 3	0.0219871	6.31049	0.580289	0.145704	-0.136234	-2.26209	-0.796422	-1.19382
	Day 3	-0.414652		-0.556071	-0.490424		5.38551					Day 3		6.25618	-0.460856		0.341595	-4.41182	-0.356575	-3.14939
	Day 5	0.254915	1.28851	0.0878425	2.14559	0.00965077	5.93951					Day 5	-1.11021	3.69265	1.12693	2.81988	-1.01015	4.48218	-0.488973	3.49172
	Day 5	-0.263672	0.819406		1.69086	-0.128513	5.64972					Day 5	1.8316	2.23365	-1.56461	2.79143	-1.47993	4.35486	-0.776428	2.90757
	Day 5	0.417847	0.406363	0.722266		0.118862	4.67587					Day 5	-0.721385	3.44009	0.437683	1.38899	2.49008		1.2654
	Empty											Empty
		RAP2.12		RAP2.2		ADH1							HRE2		PIN1		LBD16		LBD18
		WW	W	WW	W	WW	W						WW	W	WW	W	WW	W	WW	W
	Day 1	-0.751267	-0.41105		-1.33525		3.46412					Day 1	-0.872357	3.14436	-0.197596	-1.53089	-3.80459	-2.3952	-3.1609	-3.45542
	Day 1	0.665589	-0.705162	0.589673	-1.58451	1.11703	2.88338					Day 1	-0.125603		-0.308818	-2.71084	1.2983	-4.89907	1.05919	-5.38253
	Day 1	0.387579	-0.69045	0.662447	-1.6299	1.53078	3.67048					Day 1	0.99796	1.9651	0.554509		2.5063	-5.82207	2.10171	-7.6641
	Day 3	-0.181086		0.0735159		-1.08812	5.71173					Day 3	0.625679	7.9524	-0.325262	0.445356	-4.07963	-1.96644	-3.20667	-1.26669
	Day 3	0.036393	0.112834	-0.0708142	0.563378	1.04699	6.79117					Day 3	0.953372	9.01789	0.0681496	0.430002	1.49312	-2.49613	1.10343	-2.49519
	Day 3	0.144693	0.764622	0.0212252	0.595349	0.0411232						Day 3	-1.57905		0.257113		2.5865	-2.73025	2.10323	-2.01768
	Day 5	0.085035		-0.398722	2.14559	-0.0131548						Day 5	0.64339	5.0281	-0.485653	-4.15545	-0.246533	-6.9835	-0.378769	-5.39578
	Day 5	-0.62072	1.09233	-8.27567e-05	1.69086		5.95994					Day 5	-1.1849	5.03771	-0.761594		-0.720138	-3.46717	-0.773088	-3.23051
	Day 5	0.535685	0.328371	0.398805		0.599928	5.6591					Day 5	0.541505		1.24725	-4.0252	0.966672	-3.09397	1.15186	-4.65417
	Line 1											Line 1
		RAP2.12		RAP2.2		ADH1		GOI					HRE2		PIN1		LBD16		LBD18
		WW	W	WW	W	WW	W	WW	W				WW	W	WW	W	WW	W	WW	W
	Day 1	-0.171457	-0.7108	-0.222976	0.373293	-0.474113	4.43108					Day 1	-0.0530792	3.13872	0.539216	-1.82539	-0.620373	-4.26477	-0.153184	-4.16074
	Day 1	0.167901	-1.51422	-0.693974	0.0523022		3.29009	-0.819658	-3.68739			Day 1	-0.295945	1.78219	0.117618	-1.84503	0.36609	-1.78089	0.183167	-3.34508
	Day 1		-2.10996			-0.46126	2.5115	-0.618988	-3.12116			Day 1	0.349024	0.745616	-0.656834		0.254284	-6.99451	-0.0299829	-6.82881
	Day 3		1.41475	-0.597204	1.64782	0.2853	7.29956	-1.13379	2.03915			Day 3	0.838072	7.9116	1.31528	0.71935	2.82886	-2.00059	1.50516	0.871493
	Day 3	-0.356522	1.01206	0.56001	1.89022	-0.116664	7.46672	0.762647	1.31828			Day 3	-1.12168	7.76584	-1.36861	0.841012	-1.78137	0.484314	-1.02204	0.933049
	Day 3	-0.341412		0.648327	1.85016	0.442497	5.9366	0.982276	1.47986			Day 3	0.283606	4.25281	0.0533311		-1.04748	1.33942	-0.483119
	Day 5	-0.483042	-0.271121	0.0251138	0.19751	-0.0110869	5.77588		0.738354			Day 5	0.180825	7.26719	0.716103	0.985917	0.916938	5.51777	0.39204
	Day 5		0.73905	0.89771	1.29603		8.39971	1.39223	0.92593			Day 5	0.435416	5.57461	-0.134266	-0.934796	0.276308	-0.673894	0.160357	-1.58722
	Day 5	-0.423668		-0.922824		-0.629271	4.41887	-0.0260932				Day 5	-0.616241	4.11812	-0.581837	-1.76076	-1.19325	-1.63744	-0.552397	-2.8822
	Line 5											Line 5
		RAP2.12		RAP2.2		ADH1		GOI					HRE2		PIN1		LBD16		LBD18
		WW	W	WW	W	WW	W	WW	W				WW	W	WW	W	WW	W	WW	W
	Day 1	0.10688	-0.711545	0.610194	0.612497	0.11713	2.05205	-1.64509	-0.199014			Day 1	0.122778	-2.07664	-0.206384	2.21021	1.18254	-0.0572738	0.60295	1.35579
	Day 1	-0.331957	-1.10227	0.444924	-0.356723	0.186874	2.32801	1.57795				Day 1	-0.104981	2.27587	0.196958	2.74245	-0.583674	-2.63243	-0.537465	2.07645
	Day 1	0.225078	-2.30647	0.437142		-0.304004		0.0671409	-0.678993			Day 1	-0.0177975	0.0859806	0.00942573		-0.598864	-3.62177	-0.065485	1.39008
	Day 3	-0.450867	1.1993		1.47495		5.17943	-0.420432	2.46913			Day 3	-0.114288	6.72854	-0.971657	0.450428	-0.233344	-1.15224	0.0454186	-1.18652
	Day 3	-0.411511		0.043329	1.84087	0.286035	6.1064	0.210589				Day 3	2.14958	6.55154	1.78286	1.42346	2.25353	-1.17316	2.65888	-0.329769
	Day 3		0.916068	0.597607	1.01741	0.448722	5.01114		1.20126			Day 3	-2.03529	2.8008	-0.811207	1.21135	-2.02018	-0.866486	-2.7043	-3.96903
	Day 5	0.188371		0.291999		-0.470143	6.33107	1.20225	0.509881			Day 5	-0.187226	1.89443	0.251174		-0.713379	-1.8954	-0.657119	-1.72809
	Day 5	0.281752	0.634628	0.529079	1.68285	-0.20268	7.05942	-1.31842	-2.34976			Day 5	0.24909	5.68099	-0.429153	-0.85288	-1.27611	-2.34642	-1.12086	-2.11326
	Day 5	-0.470123	1.64139		1.8452	0.672823	7.88315	0.116169	-0.0229302			Day 5	-0.0618642	7.55147	0.177979	-1.70346	1.98949		1.77798
	*Empty means ommited data.
