# Supplementary material for: Expressing banana transcription factor MaERFVII3 in Arabidopsis confers enhanced waterlogging tolerance and root growth
Source: PeerJ. 2024 Apr 30;12:e17285. doi: 10.7717/peerj.17285 (PMC11067909; doi:10.7717/peerj.17285)
Supplement: Supplemental Information 18 [file peerj-12-17285-s018.xls]

## Sheet: Sheet1
ITEM TO CHECK	IMPORTANCE	CHECKLIST	REMARKS
EXPERIMENTAL DESIGN
Definition of experimental and control groups	E	√	Lines 169-171
Number within each group	E	√	Lines 199-200
Assay carried out by core lab or investigator's lab?	D	√	Core lab
Acknowledgement of authors' contributions	D
SAMPLE
Description	E	√	Lines 163 - 165
Volume/mass of sample processed	D	√	Line 180
Microdissection or macrodissection	E		N/A
Processing procedure	E	√	Line 175; snap-frozen immediately
If frozen - how and how quickly?	E	√	Line 175; snap-frozen immediately
If fixed - with what, how quickly?	E		N/A
Sample storage conditions and duration (especially for FFPE samples)	E	√	Lines 175-176
NUCLEIC ACID EXTRACTION
Procedure and/or instrumentation	E	√	Lines 179-182
Name of kit and details of any modifications	E	√	Line 181
Source of additional reagents used	D		N/A
Details of DNase or RNAse treatment	E	√	Line 182
Contamination assessment (DNA or RNA)	E	√	Lines 182-185
Nucleic acid quantification	E	√	Line 182
Instrument and method	E	√	Lines 182 and 185
Purity (A260/A280)	D	√	Line 183
Yield	D	√	Line 183
RNA integrity method/instrument	E	√	Lines 184-195
RIN/RQI or Cq of 3' and 5' transcripts	E		N/A
Electrophoresis traces	D	√	Lines 184-185
Inhibition testing (Cq dilutions, spike or other)	E	√	Supplementary Figure 5
REVERSE TRANSCRIPTION
Complete reaction conditions	E	√	Lines 185 - 192
Amount of RNA and reaction volume	E	√	Lines 185 - 192
Priming oligonucleotide (if using GSP) and concentration	E	√	Lines 188-189
Reverse transcriptase and concentration	E	√	Line 188
Temperature and time	E	√	Lines 188 - 192
Manufacturer of reagents and catalogue numbers	D
Cqs with and without RT	D*
Storage conditions of cDNA	D	√	Line 192
qPCR TARGET INFORMATION
If multiplex, efficiency and LOD of each assay.	E		N/A
Sequence accession number	E	√	Line 195; Table 1
Location of amplicon	D	√	Supplementary file - In silico analysis
Amplicon length	E	√	Line 195; Table 1
In silico specificity screen (BLAST, etc)	E	√	Supplementary file - In silico analysis
Pseudogenes, retropseudogenes or other homologs?	D
Sequence alignment	D
Secondary structure analysis of amplicon	D
Location of each primer by exon or intron (if applicable)	E		N/A
What splice variants are targeted?	E		N/A
qPCR OLIGONUCLEOTIDES
Primer sequences	E	√	Line 195; Table 1
RTPrimerDB Identification Number	D
Probe sequences	D**
Location and identity of any modifications	E	√	No modifications. Sequence has been provided in Table 1 (Line 195)
Manufacturer of oligonucleotides	D
Purification method	D
qPCR PROTOCOL
Complete reaction conditions	E	√	Lines 193-200
Reaction volume and amount of cDNA/DNA	E	√	Lines 195 - 197
Primer, (probe), Mg++ and dNTP concentrations	E	√	Lines 195 -197
Polymerase identity and concentration	E	√	Line 196
Buffer/kit identity and manufacturer	E	√	Line 196
Exact chemical constitution of the buffer	D
Additives (SYBR Green I, DMSO, etc.)	E	√	Line 196
Manufacturer of plates/tubes and catalog number	D
Complete thermocycling parameters	E	√	Lines 197 - 198
Reaction setup (manual/robotic)	D
Manufacturer of qPCR instrument	E	√	Lines 193-194
qPCR VALIDATION
Evidence of optimisation (from gradients)	D
Specificity (gel, sequence, melt, or digest)	E	√	Supplementary Figure 5
For SYBR Green I, Cq of the NTC	E	√	Supplementary Figure 6
Standard curves with slope and y-intercept	E	√	Supplementary Figure 5
PCR efficiency calculated from slope	E	√	Supplementary Figure 5
Confidence interval for PCR efficiency or standard error	D
r2 of standard curve	E	√	Supplementary Figure 5
Linear dynamic range	E	√	Supplementary Figure 5
Cq variation at lower limit	E	√	Supplementary Figure 5
Confidence intervals throughout range	D
Evidence for limit of detection	E	√	Supplementary Figure 5
If multiplex, efficiency and LOD of each assay.	E		N/A
DATA ANALYSIS
qPCR analysis program (source, version)	E	√	Line 194
Cq method determination	E	√	Line 200
Outlier identification and disposition	E	√	Outlier is indicated in the raw data.
Results of NTCs	E	√	Supplementary Figure 6
Justification of number and choice of reference genes	E	√	Lines 199-200
Description of normalisation method	E	√	Line 200
Number and concordance of biological replicates	D	√	Line 200
Number and stage (RT or qPCR) of technical replicates	E	√	Lines 199-200
Repeatability (intra-assay variation)	E	√	Lines 199-200
Reproducibility (inter-assay variation, %CV)	D
Power analysis	D
Statistical methods for result significance	E	√	Lines 203 - 206
Software (source, version)	E	√	Line 204
Cq or raw data submission using RDML	D
Table 1. MIQE checklist for authors, reviewers and editors. All essential information (E) must be submitted with the manuscript. Desirable
information (D) should be submitted if available. If using primers obtained from RTPrimerDB, information on qPCR target, oligonucleotides,
protocols and validation is available from that source.
*: Assessing the absence of DNA using a no RT assay is essential when first extracting RNA. Once the sample has been validated as
RDNA-free, inclusion of a no-RT control is desirable, but no longer essential.
**: Disclosure of the probe sequence is highly desirable and strongly encouraged. However, since not all commercial pre-designed assay
vendors provide this information, it cannot be an essential requirement. Use of such assays is advised against.
